# Supplementary material for: Single-cell morphology encodes metastatic potential
Source: PubMed Central journal article supplement — Sci Adv. 2020 Jan 22;6(4):eaaw6938. doi: 10.1126/sciadv.aaw6938 (PMC6976289; doi:10.1126/sciadv.aaw6938), 2020-01-22
Supplement: aaw6938_SM.pdf [file aaw6938_SM.pdf]

## Supplementary Materials for

### Single-cell morphology encodes metastatic potential

Pei-Hsun Wu\*, Daniele M. Gilkes, Jude M. Phillip, Akshay Narkar, Thomas Wen-Tao Cheng, Jorge Marchand, Meng-Horng Lee, Rong Li, Denis Wirtz\*

\*Corresponding author. Email: [pwu@jhu.edu](mailto:pwu@jhu.edu) (P.-H.W.); [wirtz@jhu.edu](mailto:wirtz@jhu.edu) (D.W.)

Published 22 January 2020, *Sci. Adv.* **6**, eaaw6938 (2020)  
DOI: 10.1126/sciadv.aaw6938

#### The PDF file includes:

- Fig. S1. Cell polymorphism in cancer cells derived from primary pancreatic tumors and metastases.
- Fig. S2. Morphological spectrum of SCCs.
- Fig. S3. Quantitative morphology analysis of metastasis of breast cancer cells.
- Fig. S4. SCCs derived from the same parental breast cancer cells show divergent invasive behavior in vivo.
- Fig. S5. Analysis of SCC with migration and proliferation assay.
- Fig. S6. Lung tissue sections in tail vein metastasis model for different SCCs.
- Fig. S7. Distinct gene expression profiles of SCCs reveal prognostic genes.
- Fig. S8. Morphological features.
- Legends for tables S1 to S5

#### Other Supplementary Material for this manuscript includes the following:

(available at [advances.sciencemag.org/cgi/content/full/6/4/eaaw6938/DC1](https://advances.sciencemag.org/cgi/content/full/6/4/eaaw6938/DC1))

- Table S1 (Microsoft Excel format). Summary of SCC information.
- Table S2 (Microsoft Excel format). Genes that are highly differentially expressed among SCP.
- Table S3 (Microsoft Excel format). Differentially expressed genes among LT versus T versus M'.
- Table S4 (Microsoft Excel format). List of genes affiliated with regulation of cell shape.
- Table S5 (Microsoft Excel format). Summary of CM features.
- Table S6 (Microsoft Excel format). Whole-genome gene expression data of MDA-MB-231 SCCs.

## Supplementary materials

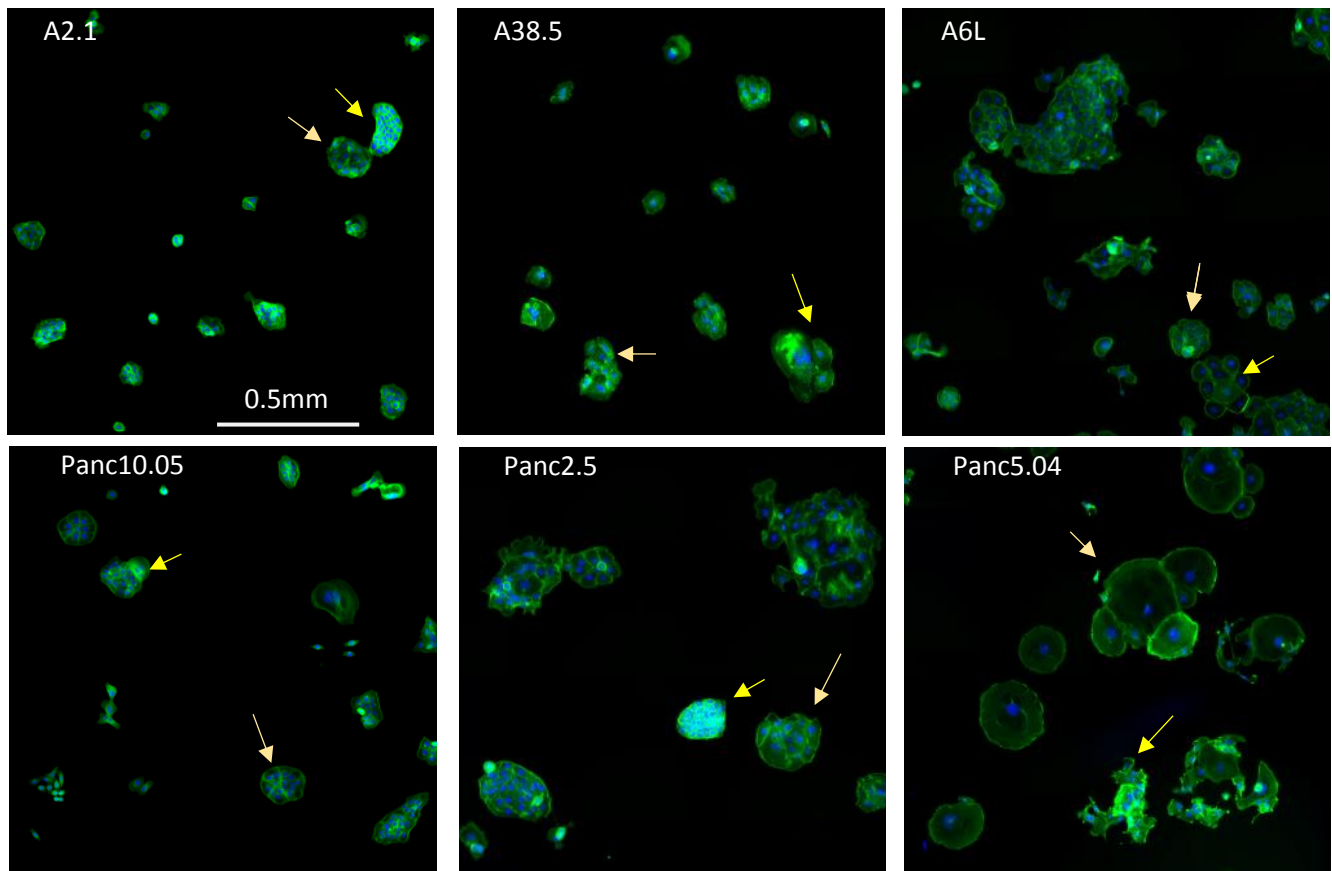

**Fig. S1. Cell polymorphism in cancer cells derived from primary pancreatic tumors and metastases.** Representative images of pancreatic cancer cells stained for their nucleus (blue) and F-actin (green) in the ultra low-density growth conditions. These include cancer cells derived from metastases that spread from pancreatic tumors (A2.1, A38.5 and A6L) and cells derived from primary pancreatic tumors (Panc10.05, Panc2.5 and Panc5.04). Cells formed several spatially and morphologically distinct progenies. Arrows highlight colonies with distinct cell morphology of the same type.

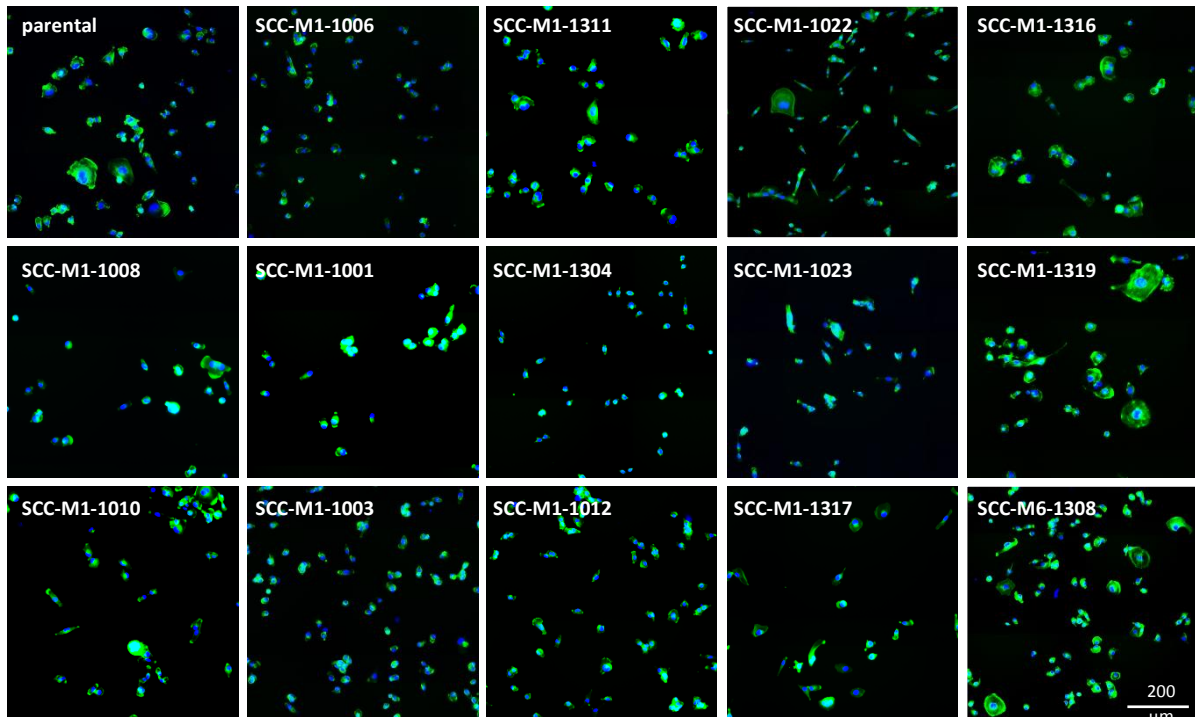

**Fig. S2. Morphological spectrum of SCCs.** Representative images of 14 different SCCs and their parental MDA-MB-231 breast cancer cells; nuclei and F-actin were stained and shown in blue and green, respectively.

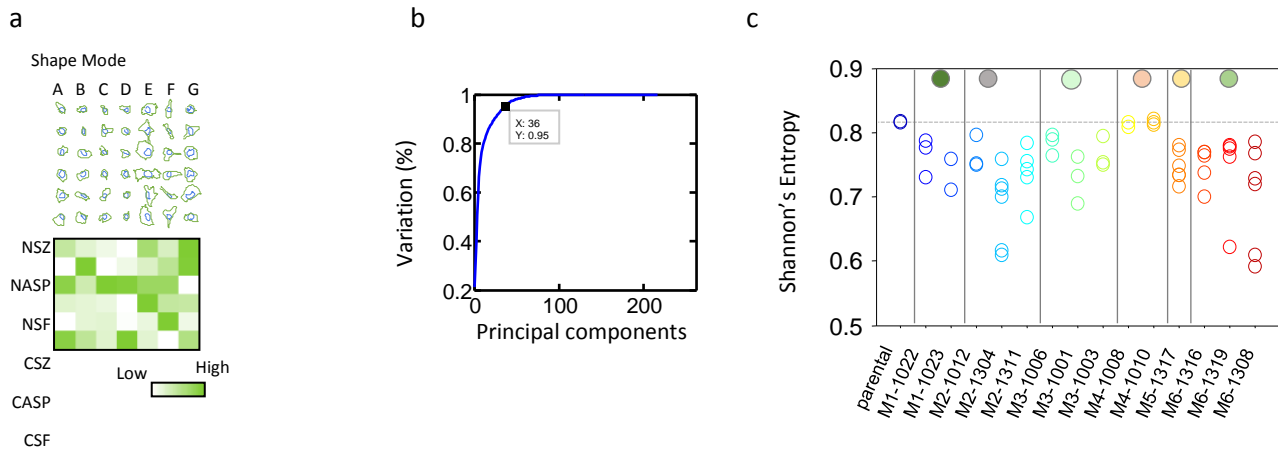

**Fig. S3. Quantitative morphology analysis of metastasis of breast cancer cells.** **a.** A heat map shows the average nucleus size (NSZ), the nucleus aspect ratio (NASP), the nucleus shape factor (NSF), the cell size (CSZ), the cell aspect ratio (CASP), and the cell shape factor (CSF) for the cell morph classes A-G. The aspect ratio is defined as the ratio between the lengths of the long axis and short axis. The shape factor was calculated using  $4\pi \times (\text{Area}) / (\text{perimeter}^2)$ . **b.** Principal component analysis for cell morphology feature matrix of SCC cells shows that 95% of variations were covered by the first 36 eigenvectors. **c.** Shannon's entropy of CM distribution for different SCCs. The numbers at the bottom indicate the corresponding morpho-types of the SCCs.

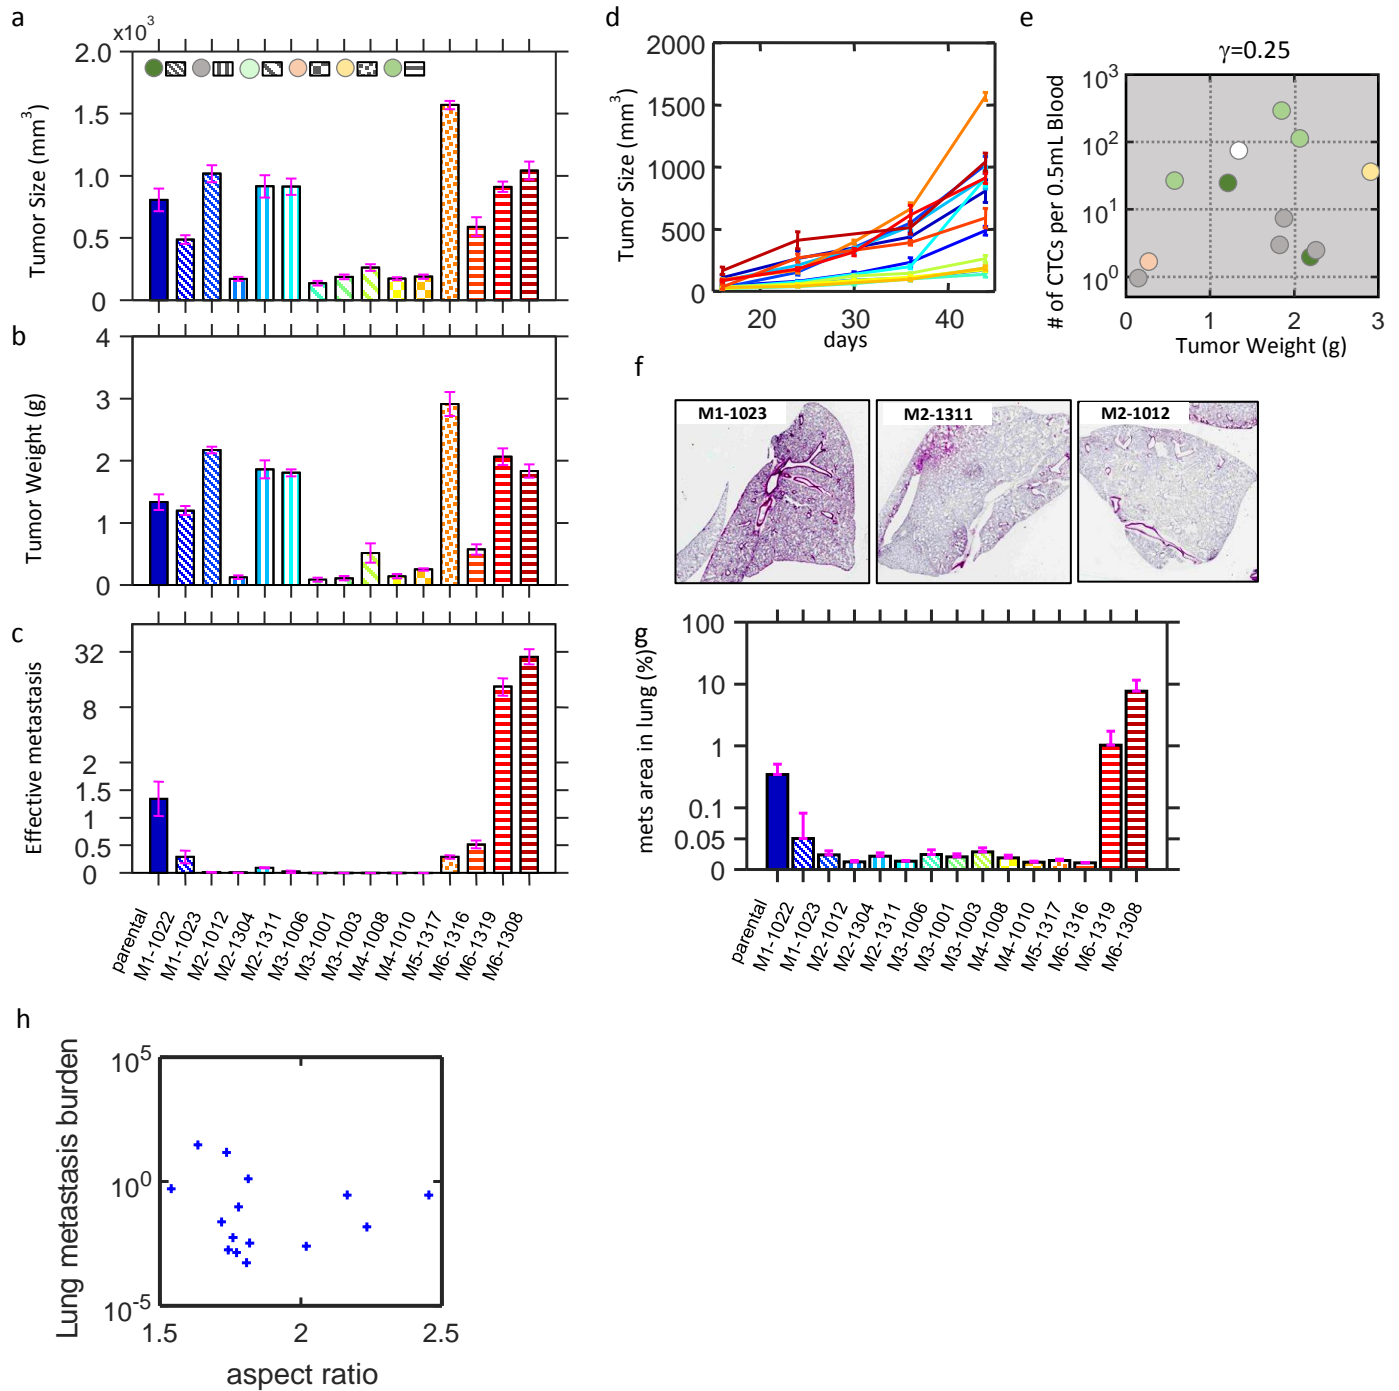

**Fig. S4. SCCs derived from the same parental breast cancer cells show divergent invasive behavior in vivo.** **a-c.** Bar graphs show the tumor size (a), tumor weight (b), and effective metastasis to the lung (c) after injecting different SCCs into the mammary pad of mice. **d.** Growth of tumors formed by different SCCs. **e.** Scatter plot shows that the CTC count and tumor weight of different SCCs are poorly correlated (Pearson correlation coefficient of 0.25). **f.** Histological sections of mice lung show metastatic lesion free are presented in SCC-1023, SCC-1311 and SCC-1012. At least four mice were tested for each SCC. **g.** Measurement of area ratio occupied by metastasized cancer cells in the tissue sections of lung of mice. **h.** A scatter plot shows the relationship between average cell aspect ratio and corresponding lung metastasis burden (measured by human DNA in the lung) among different SCCs. There is no clear correlation between the cell aspect ratio of SCCs and their metastatic potential, with a Pearson's correlation coefficient of 0.13. Error bars represent standard error of the mean.

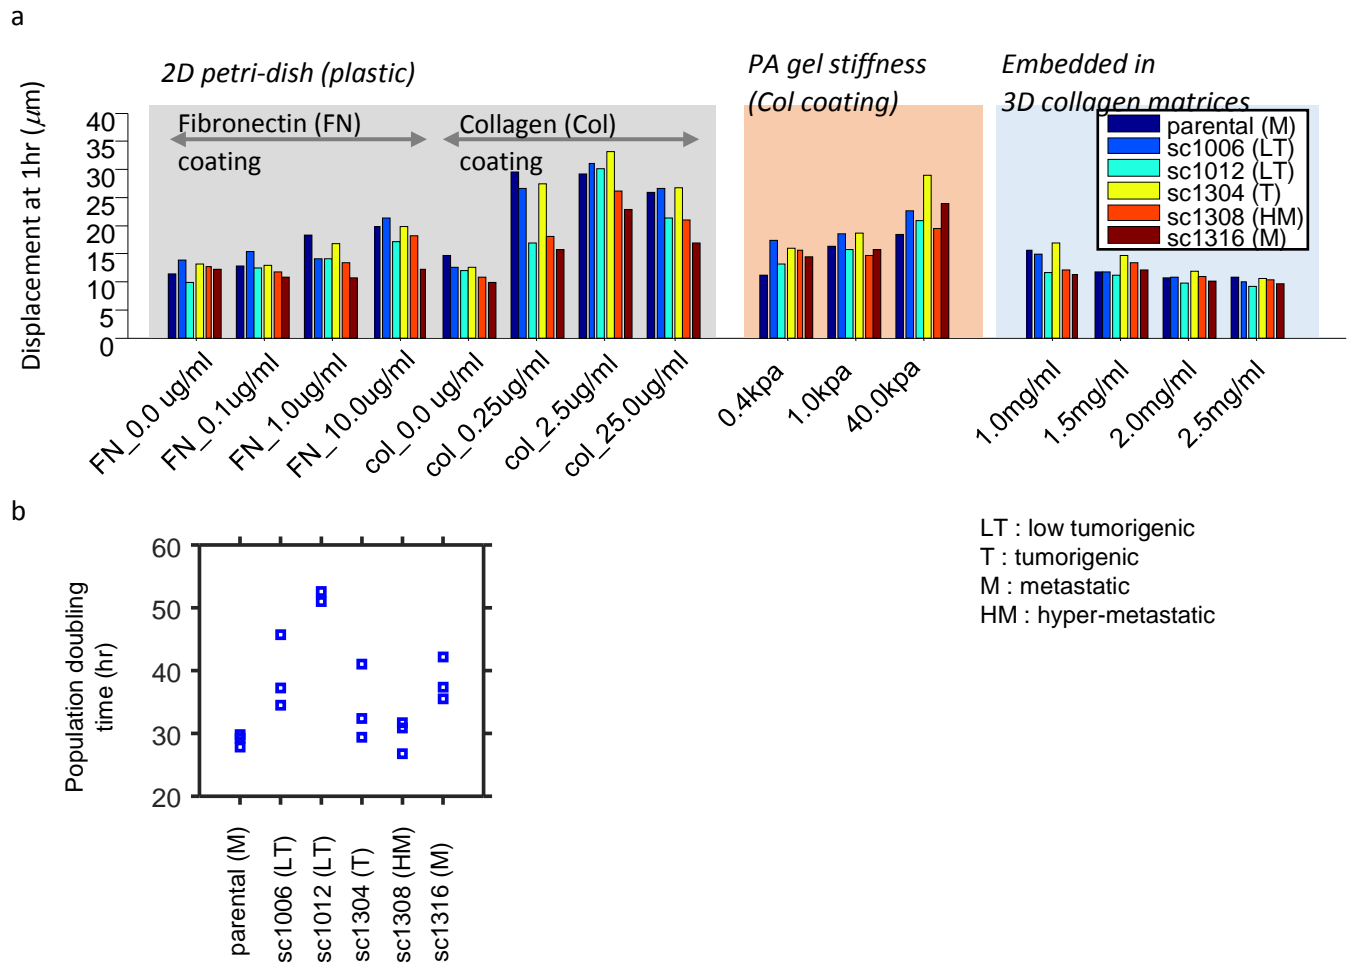

**Fig. S5. Analysis of SCC with migration and proliferation assay. a.** Migration speed of different SCCs under different culture models including 2D substrates with different concentration of fibronectin (FN) and collagen I (COL) coating on petri dishes, on 2D substrates of different stiffness (0.4kpa, 1.0kpa and 40.0kpa) and embedded in 3D collagen I matrices of four different collagen densities (1mg/ml, 1.5mg/ml, 2.0mg/ml and 2.5mg/ml). Overall the results show the metastatic SCCs, SC1308 and SC1316, do not display a more motile behavior than other SCCs in all *in vitro* models tested. **b.** Population doubling time of different SCCs. These results show little correlation between tumorigenicity (primary tumor growth) of SCCs *in vivo* and their doubling time *in vitro*.

a

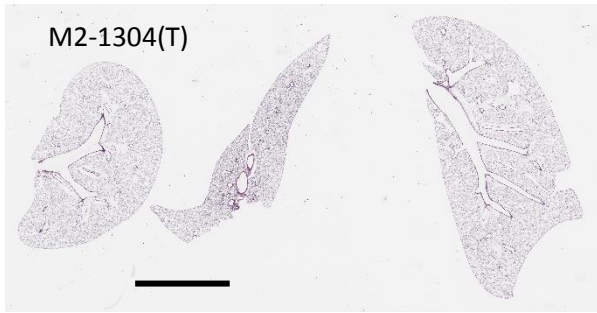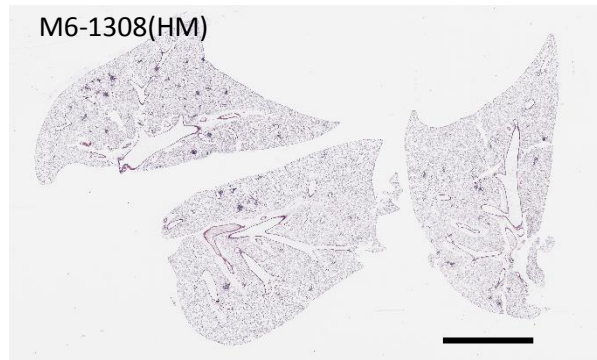

b

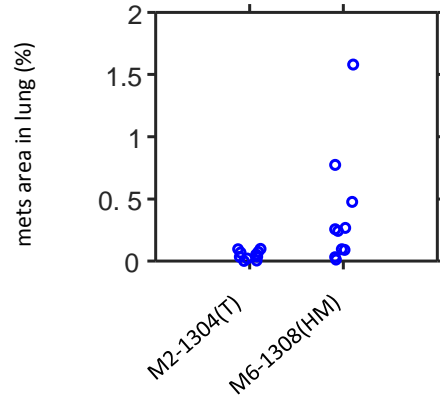

**Fig. S6. Lung tissue sections in tail vein metastasis model for different SCCs.** **a.** Histological sections of mice lung show there are multiple metastatic lesions in mice that were injected in the tail vein with SCC-1308 (HM) cells, but not with SCC-1304 (T) cells. **b.** Measurement of the area ratio occupied by metastasized tumor cells in the tissue sections of the lung of mice in these two samples.

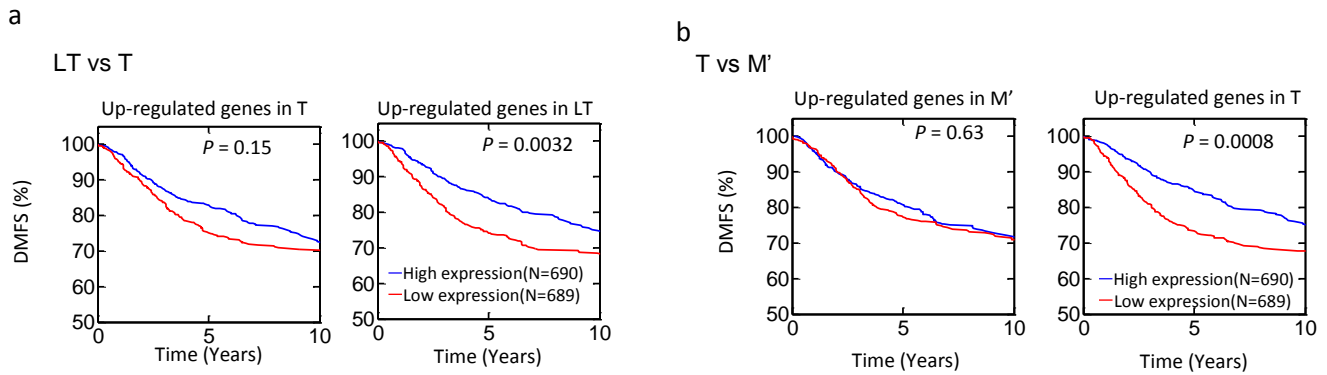

**Fig. S7. Distinct gene expression profiles of SCCs reveal prognostic genes. a-b.** Differentially expressed genes between LT-SCCs and T-SCCs (a) and between T-SCCs and M'-SCCs (b) were used to investigate the prognostication power. Patients with a higher expression of tumorigenic and metastatic suppressor genes (i.e. genes up-regulated in LT-SCCs compared to T-SCCs or genes up-regulated in T-SCCs compared to M'-SCCs) have a significantly longer survival time than patients with low expression ( $P = 0.0032$  and  $P = 0.0008$  for LT vs. T and T vs. M'). For the genes that are up-regulated in the T-SCCs compared to LT-SCCs or T-SCCs compared to M'-SCCs, no significant prognostic power was found ( $P > 0.05$ ).  $P$  value was calculated using log-rank test.



Category I : Basic morphological features

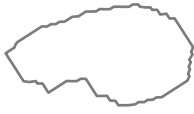

Features:  
Area, perimeter, long axis,  
aspect ratio,...etc.

Category II & III : Boundary signature and curvature

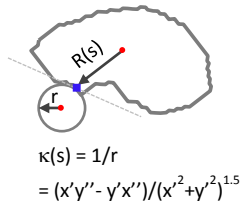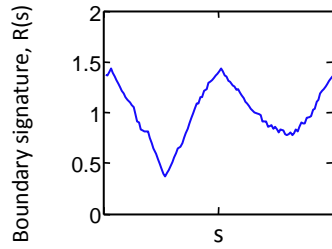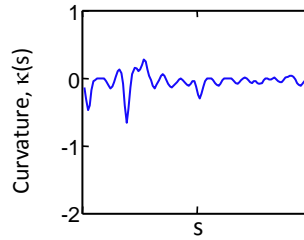

Features:  
 $mean(R)$ ,  $median(R)$ ,  $std(R)$ ,  
 $mean(\kappa)$ ,  $median(\kappa)$ ,  $std(\kappa)$ ...etc

Category IV: N-C positioning signature

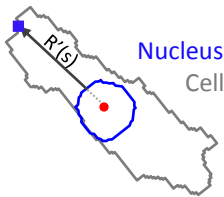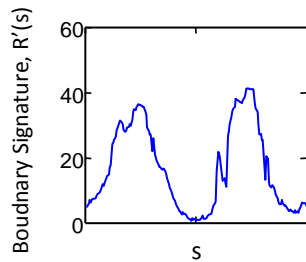

Features:  
 $mean(R')$ ,  $median(R')$ ,  
 $std(R')$ , ....etc.

Category V: Protrusion

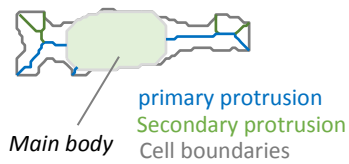

Features:  
Protrusion numbers,  
<protrusion length>  
...etc.

**Fig. S8. Morphological features.** Schematic plots illustrating four major categories of morphological features that were extracted to quantitatively represent the morphology of individual cells.

**Table S1. Summary of SCC information.**

| Cell name | Morphotype class | Gene expression profiles | Agressiveness grade | Tested mouse number | Turmor size(mm <sup>3</sup> )<br>(mean ± sem) | Turmor weight (g)<br>(mean ± sem) | Xenograft mouse model                       |              | CTC counts (#/0.5ml blood)<br>(mean ± sem) |
|-----------|------------------|--------------------------|---------------------|---------------------|-----------------------------------------------|-----------------------------------|---------------------------------------------|--------------|--------------------------------------------|
|           |                  |                          |                     |                     |                                               |                                   | Effective metastasis (A.U.)<br>(mean ± sem) |              |                                            |
| parental  | 4                | 4                        | M                   | 8                   | 807.9 ± 257.2                                 | 1.34 ± 0.13                       | $1.3 \times 10^0 \pm 1.3 \times 10^{-1}$    | 71.8 ± 8.17  |                                            |
| SCC-1006  | 3                | 1                        | LT                  | 4                   | 137.0 ± 39.2                                  | 0.09 ± 0.03                       | $1.4 \times 10^{-3} \pm 4.5 \times 10^{-4}$ | N.A.         |                                            |
| SCC-1001  | 3                | 1                        | LT                  | 4                   | 188.0 ± 39.7                                  | 0.11 ± 0.04                       | $3.4 \times 10^{-3} \pm 5.7 \times 10^{-4}$ | N.A.         |                                            |
| SCC-1003  | 3                | 1                        | LT                  | 4                   | 263.2 ± 55.6                                  | 0.51 ± 0.16                       | $1.8 \times 10^{-3} \pm 4.2 \times 10^{-4}$ | N.A.         |                                            |
| SCC-1008  | 4                | 1                        | LT                  | 4                   | 174.3 ± 26.1                                  | 0.14 ± 0.04                       | $2.5 \times 10^{-3} \pm 8.9 \times 10^{-4}$ | N.A.         |                                            |
| SCC-1010  | 4                | 1                        | LT                  | 4                   | 189.6 ± 34.6                                  | 0.25 ± 0.02                       | $5.5 \times 10^{-4} \pm 1.2 \times 10^{-4}$ | 1.6 ± 0.4    |                                            |
| SCC-1012  | 2                | 1                        | LT                  | 4                   | 172.0 ± 29.6                                  | 0.13 ± 0.03                       | $5.6 \times 10^{-3} \pm 1.2 \times 10^{-3}$ | 1.0 ± 0.0    |                                            |
| SCC-1304  | 2                | 3                        | T                   | 4                   | 916.1 ± 180.4                                 | 1.86 ± 0.14                       | $9.6 \times 10^{-2} \pm 1.0 \times 10^{-2}$ | 7.4 ± 0.7    |                                            |
| SCC-1311  | 2                | 3                        | T                   | 4                   | 912.8 ± 133.0                                 | 1.81 ± 0.06                       | $2.4 \times 10^{-2} \pm 1.9 \times 10^{-2}$ | 3.0 ± 1.3    |                                            |
| SCC-1022  | 1                | 2                        | T                   | 4                   | 488.7 ± 71.4                                  | 1.20 ± 0.07                       | $2.9 \times 10^{-1} \pm 1.1 \times 10^{-1}$ | 24.6 ± 8.3   |                                            |
| SCC-1023  | 1                | 2                        | T                   | 4                   | 1017.9 ± 136.8                                | 2.18 ± 0.05                       | $1.5 \times 10^{-2} \pm 5.6 \times 10^{-3}$ | 2.0 ± 0.4    |                                            |
| SCC-1317  | 5                | 3                        | T                   | 4                   | 1569.1 ± 65.3                                 | 2.92 ± 0.19                       | $2.9 \times 10^{-1} \pm 2.8 \times 10^{-2}$ | 35.8 ± 11.0  |                                            |
| SCC-1316  | 6                | 4                        | M                   | 4                   | 590.5 ± 171.8                                 | 0.58 ± 0.08                       | $5.2 \times 10^{-1} \pm 7.0 \times 10^{-2}$ | 26.8 ± 4.9   |                                            |
| SCC-1319  | 6                | 4                        | HM                  | 4                   | 912.5 ± 83.8                                  | 2.07 ± 0.13                       | $1.5 \times 10^1 \pm 3.0 \times 10^0$       | 112.6 ± 28.7 |                                            |
| SCC-1308  | 6                | 4                        | HM                  | 4                   | 1042.1 ± 145.0                                | 1.84 ± 0.11                       | $3.0 \times 10^1 \pm 5.5 \times 10^0$       | 293.0 ± 55.4 |                                            |

**Table S2. Genes that are highly differentially expressed among SCP.**

| probe ID      | Gene Symbol | Gene title                                                          | S.D. of SCP gene expression (in log2) | range of SCP gene expression (in log2) | max diff gene exp relative to parental (in log2) |
|---------------|-------------|---------------------------------------------------------------------|---------------------------------------|----------------------------------------|--------------------------------------------------|
| 11738785_at   | SPANXB2     | SPANX family, member B2                                             | 4.09                                  | 10.10                                  | 1.57                                             |
| 11738786_x_at | SPANXB2     | SPANX family, member B2                                             | 3.95                                  | 9.99                                   | 2.08                                             |
| 11731994_s_at | SPANXE      | SPANX family, member E                                              | 3.83                                  | 9.66                                   | 2.79                                             |
| 11726177_s_at | SPANXB2     | SPANX family, member B2                                             | 3.78                                  | 9.49                                   | 2.34                                             |
| 11734286_a_at | COX7B2      | cytochrome c oxidase subunit VIIb2                                  | 3.42                                  | 7.62                                   | 0.97                                             |
| 11726339_s_at | MAGEA3      | melanoma antigen family A, 3                                        | 3.14                                  | 7.76                                   | 1.73                                             |
| 11749461_a_at | CDH11       | cadherin 11, type 2, OB-cadherin (osteoblast)                       | 3.03                                  | 7.98                                   | 2.13                                             |
| 11728829_at   | INHBB       | inhibin, beta B                                                     | 2.89                                  | 7.97                                   | 2.13                                             |
| 11724322_a_at | CST6        | cystatin E/M                                                        | 2.80                                  | 6.99                                   | 5.07                                             |
| 11728190_s_at | CXCR4       | chemokine (C-X-C motif) receptor 4                                  | 2.77                                  | 7.40                                   | 0.72                                             |
| 11754662_s_at | ADAMTS1     | ADAM metalloproteinase with thrombospondin type 1 motif, 1          | 2.75                                  | 6.90                                   | 0.00                                             |
| 11720146_a_at | DAPK1       | death-associated protein kinase 1                                   | 2.71                                  | 7.08                                   | 1.92                                             |
| 11744581_a_at | KHDRBS3     | KH domain containing, RNA binding, signal transduction associated 3 | 2.68                                  | 6.95                                   | 0.00                                             |
| 11742710_a_at | SRGN        | serglycin                                                           | 2.63                                  | 7.03                                   | 0.13                                             |
| 11747952_a_at | TNFSF10     | tumor necrosis factor (ligand) superfamily, member 10               | 2.59                                  | 6.84                                   | 6.19                                             |
| 11729544_at   | MAGEC1      | melanoma antigen family C, 1                                        | 2.53                                  | 6.76                                   | 0.72                                             |
| 11715455_x_at | KISS1       | KiSS-1 metastasis-suppressor                                        | 2.50                                  | 7.75                                   | 1.06                                             |
| 11724885_at   | CLIC3       | chloride intracellular channel 3                                    | 2.47                                  | 7.24                                   | 5.61                                             |
| 11715454_at   | KISS1       | KiSS-1 metastasis-suppressor                                        | 2.46                                  | 7.44                                   | 0.89                                             |
| 11748907_a_at | RARRES3     | retinoic acid receptor responder (tazarotene induced) 3             | 2.46                                  | 6.91                                   | 6.10                                             |
| 11729543_a_at | MAGEC1      | melanoma antigen family C, 1                                        | 2.46                                  | 6.65                                   | 1.00                                             |
| 11743730_at   | TNFSF10     | tumor necrosis factor (ligand) superfamily, member 10               | 2.46                                  | 6.39                                   | 6.19                                             |
| 11719692_a_at | RARRES3     | retinoic acid receptor responder (tazarotene induced) 3             | 2.43                                  | 6.83                                   | 5.93                                             |
| 11726250_at   | AGR2        | anterior gradient 2 homolog (Xenopus laevis)                        | 2.41                                  | 6.61                                   | 2.70                                             |
| 11719172_x_at | AKR1C1      | aldo-keto reductase family 1, member C1                             | 2.36                                  | 7.51                                   | 4.97                                             |
| 11743731_a_at | TNFSF10     | tumor necrosis factor (ligand) superfamily, member 10               | 2.36                                  | 6.53                                   | 5.90                                             |
| 11719414_a_at | PBX1        | pre-B-cell leukemia homeobox 1                                      | 2.36                                  | 6.48                                   | 4.58                                             |
| 11729495_at   | FAM133A     | family with sequence similarity 133, member A                       | 2.35                                  | 6.47                                   | 1.99                                             |
| 11727844_a_at | KRT81       | keratin 81                                                          | 2.35                                  | 6.17                                   | 0.86                                             |
| 11740312_at   | HAS2        | hyaluronan synthase 2                                               | 2.35                                  | 6.79                                   | 0.46                                             |
| 11732318_a_at | KHDRBS3     | KH domain containing, RNA binding, signal transduction associated 3 | 2.34                                  | 6.17                                   | 0.06                                             |
| 11754189_s_at | AKR1C1      | aldo-keto reductase family 1, member C1                             | 2.32                                  | 8.07                                   | 4.50                                             |
| 11755928_s_at | MMP1        | matrix metalloproteinase 1 (interstitial collagenase)               | 2.32                                  | 6.91                                   | 1.84                                             |
| 11719171_a_at | AKR1C1      | aldo-keto reductase family 1, member C1                             | 2.31                                  | 7.19                                   | 4.89                                             |
| 11757871_s_at | PBX1        | pre-B-cell leukemia homeobox 1                                      | 2.31                                  | 5.97                                   | 4.14                                             |
| 11729496_at   | FAM133A     | family with sequence similarity 133, member A                       | 2.29                                  | 5.97                                   | 1.59                                             |
| 11728189_a_at | CXCR4       | chemokine (C-X-C motif) receptor 4                                  | 2.29                                  | 6.52                                   | 1.06                                             |
| 11739696_s_at | AFF3        | AF4/FMR2 family, member 3                                           | 2.24                                  | 5.53                                   | 0.24                                             |
| 11746283_s_at | KRTAP2-3    | keratin associated protein 2-3                                      | 2.22                                  | 5.87                                   | 1.35                                             |
| 11754879_a_at | SDR16C5     | short chain dehydrogenase/reductase family 16C, member 5            | 2.21                                  | 5.98                                   | 1.94                                             |
| 11758031_s_at | BHLHE41     | basic helix-loop-helix family, member e41                           | 2.21                                  | 5.65                                   | 0.51                                             |
| 11747096_a_at | KCNK1       | potassium channel, subfamily K, member 1                            | 2.18                                  | 4.99                                   | 0.10                                             |
| 11731538_a_at | GPR110      | G protein-coupled receptor 110                                      | 2.17                                  | 6.23                                   | 3.26                                             |
| 11741223_s_at | FAM198B     | family with sequence similarity 198, member B                       | 2.17                                  | 5.70                                   | 5.45                                             |
| 11758102_s_at | TMEM163     | transmembrane protein 163                                           | 2.17                                  | 6.39                                   | 2.53                                             |
| 11743350_a_at | C15orf48    | chromosome 15 open reading frame 48                                 | 2.17                                  | 6.63                                   | 5.25                                             |
| 11719562_at   | SOX4        | SRY (sex determining region Y)-box 4                                | 2.16                                  | 5.54                                   | 0.93                                             |
| 11726812_a_at | TFF1        | trefoil factor 1                                                    | 2.14                                  | 6.39                                   | 2.88                                             |
| 11721984_at   | C7orf29     | chromosome 7 open reading frame 29                                  | 2.14                                  | 5.82                                   | 5.42                                             |
| 11727690_at   | IL11        | interleukin 11                                                      | 2.13                                  | 6.14                                   | 1.22                                             |
| 11715711_a_at | AKR1C3      | aldo-keto reductase family 1, member C3                             | 2.13                                  | 6.67                                   | 5.00                                             |
| 11733461_at   | SUSD5       | sushi domain containing 5                                           | 2.12                                  | 5.59                                   | 0.16                                             |
| 11736687_a_at | FGF5        | fibroblast growth factor 5                                          | 2.11                                  | 5.46                                   | 0.81                                             |
| 11737331_at   | PDE1C       | phosphodiesterase 1C, calmodulin-dependent 70kDa                    | 2.11                                  | 5.66                                   | 1.12                                             |
| 11757480_x_at | IFI27       | interferon, alpha-inducible protein 27                              | 2.10                                  | 6.27                                   | 3.51                                             |
| 11722888_s_at | EMB         | embigin                                                             | 2.09                                  | 5.76                                   | 0.54                                             |
| 11727984_at   | TENM3       | teneurin transmembrane protein 3                                    | 2.08                                  | 5.57                                   | 0.01                                             |
| 11719120_a_at | KYNU        | kynureninase                                                        | 2.07                                  | 6.17                                   | 1.77                                             |
| 11758227_s_at | ROBO1       | roundabout, axon guidance receptor, homolog 1 (Drosophila)          | 2.06                                  | 5.22                                   | 0.22                                             |
| 11751833_a_at | BCHE        | butyrylcholinesterase                                               | 2.06                                  | 5.95                                   | 1.28                                             |
| 11719384_at   | PRSS3       | protease, serine, 3                                                 | 2.06                                  | 5.76                                   | 1.07                                             |
| 11716329_s_at | GJA1        | gap junction protein, alpha 1, 43kDa                                | 2.06                                  | 6.71                                   | 0.37                                             |
| 11744195_at   | FAT3        | FAT tumor suppressor homolog 3 (Drosophila)                         | 2.05                                  | 5.61                                   | 1.02                                             |
| 11724795_at   | ZG16B       | zymogen granule protein 16B                                         | 2.04                                  | 5.57                                   | 4.19                                             |
| 11736688_x_at | FGF5        | fibroblast growth factor 5                                          | 2.04                                  | 5.33                                   | 0.62                                             |
| 11732569_at   | SLCO1B3     | solute carrier organic anion transporter family, member 1B3         | 2.04                                  | 5.84                                   | 0.12                                             |

|               |              |                                                                                    |      |      |      |
|---------------|--------------|------------------------------------------------------------------------------------|------|------|------|
| 11716017_at   | MAL2         | mal, T-cell differentiation protein 2 (gene/pseudogene)                            | 2.03 | 5.95 | 3.06 |
| 11763394_a_at | LOC100505946 | uncharacterized LOC100505946                                                       | 2.00 | 5.50 | 2.82 |
| 11757532_s_at | RBM47        | RNA binding motif protein 47                                                       | 2.00 | 5.43 | 4.58 |
| 11725057_s_at | NEDD9        | neural precursor cell expressed, developmentally down-regulated 9                  | 1.99 | 5.70 | 4.21 |
| 11746830_a_at | AGR2         | anterior gradient 2 homolog (Xenopus laevis)                                       | 1.99 | 5.84 | 2.34 |
| 11728191_x_at | CXCR4        | chemokine (C-X-C motif) receptor 4                                                 | 1.99 | 5.54 | 0.89 |
| 11716665_s_at | GDF15        | growth differentiation factor 15                                                   | 1.98 | 5.92 | 3.38 |
| 11731995_x_at | SPANXC       | SPANX family, member C                                                             | 1.98 | 6.61 | 1.21 |
| 11751225_s_at | CSF2RA       | colony stimulating factor 2 receptor, alpha, low-affinity (granulocyte-macrophage) | 1.97 | 5.75 | 3.77 |
| 11754862_a_at | RARRS2       | retinoic acid receptor responder (tazarotene induced) 2                            | 1.97 | 5.31 | 4.86 |
| 11756473_a_at | CEL2         | CUGBP, Elav-like family member 2                                                   | 1.97 | 5.53 | 0.96 |
| 11740390_a_at | RBM47        | RNA binding motif protein 47                                                       | 1.96 | 5.64 | 4.35 |
| 11758525_s_at | SOX4         | SRY (sex determining region Y)-box 4                                               | 1.96 | 5.21 | 1.09 |
| 11753942_a_at | UCA1         | urothelial cancer associated 1 (non-protein coding)                                | 1.95 | 5.75 | 2.64 |
| 11730442_s_at | FAM155A      | family with sequence similarity 155, member A                                      | 1.95 | 5.37 | 0.23 |
| 11741897_a_at | MMP1         | matrix metalloproteinase 1 (interstitial collagenase)                              | 1.95 | 6.33 | 2.06 |
| 11735833_a_at | KIAA1199     | KIAA1199                                                                           | 1.95 | 6.34 | 5.55 |
| 11757534_s_at | FAM198B      | family with sequence similarity 198, member B                                      | 1.94 | 5.34 | 5.08 |
| 11748362_s_at | ABCC3        | ATP-binding cassette, sub-family C (CFTR/MRP), member 3                            | 1.94 | 5.03 | 4.36 |
| 11725521_x_at | GLUL         | glutamate-ammonia ligase                                                           | 1.93 | 6.86 | 1.69 |
| 11735148_a_at | SOCS2        | suppressor of cytokine signaling 2                                                 | 1.92 | 5.40 | 0.00 |
| 11758070_s_at | PBX1         | pre-B-cell leukemia homeobox 1                                                     | 1.91 | 4.75 | 4.43 |
| 11736730_a_at | RIMS2        | regulating synaptic membrane exocytosis 2                                          | 1.90 | 5.02 | 1.15 |
| 11739809_at   | TMEM156      | transmembrane protein 156                                                          | 1.90 | 4.63 | 0.09 |
| 11740091_s_at | TMEM163      | transmembrane protein 163                                                          | 1.89 | 5.94 | 2.78 |
| 11762533_a_at | RAP1A        | RAP1A, member of RAS oncogene family                                               | 1.89 | 7.66 | 7.66 |
| 11717762_a_at | CPVL         | carboxypeptidase, vitellogenic-like                                                | 1.89 | 5.76 | 0.92 |
| 11717803_a_at | NTN4         | netrin 4                                                                           | 1.89 | 5.25 | 0.53 |
| 11717305_a_at | ADIRF        | adipogenesis regulatory factor                                                     | 1.88 | 6.15 | 3.12 |
| 11736729_a_at | RIMS2        | regulating synaptic membrane exocytosis 2                                          | 1.87 | 4.92 | 1.25 |
| 11726188_at   | SHISA3       | shisa homolog 3 (Xenopus laevis)                                                   | 1.87 | 4.67 | 0.25 |
| 11729647_s_at | ESM1         | endothelial cell-specific molecule 1                                               | 1.87 | 5.97 | 0.82 |
| 11757702_s_at | DSC2         | desmocollin 2                                                                      | 1.87 | 5.28 | 1.39 |
| 11723751_at   | TFF2         | trefoil factor 2                                                                   | 1.86 | 6.03 | 3.49 |
| 11734808_s_at | DTNA         | dystrobrevin, alpha                                                                | 1.85 | 4.69 | 0.69 |
| 11740311_at   | HAS2         | hyaluronan synthase 2                                                              | 1.85 | 5.65 | 0.50 |
| 11723464_s_at | CEL2         | CUGBP, Elav-like family member 2                                                   | 1.84 | 5.70 | 1.02 |
| 11756085_a_at | MAGEC1       | melanoma antigen family C, 1                                                       | 1.84 | 5.10 | 0.85 |
| 11725517_x_at | ABCG1        | ATP-binding cassette, sub-family G (WHITE), member 1                               | 1.84 | 5.22 | 2.66 |
| 11736685_a_at | FGF5         | fibroblast growth factor 5                                                         | 1.84 | 4.95 | 0.92 |
| 11718230_a_at | HLA-F        | major histocompatibility complex, class I, F                                       | 1.83 | 4.63 | 4.20 |
| 11756072_s_at | SAA1         | serum amyloid A1                                                                   | 1.83 | 6.58 | 5.83 |
| 11754856_a_at | CA12         | carbonic anhydrase XII                                                             | 1.82 | 6.34 | 3.87 |
| 11740528_a_at | AFF3         | AF4/FMR2 family, member 3                                                          | 1.82 | 4.90 | 0.49 |
| 11720947_x_at | CA12         | carbonic anhydrase XII                                                             | 1.82 | 6.42 | 3.84 |
| 11757046_a_at | LOC100127888 | uncharacterized LOC100127888                                                       | 1.82 | 5.01 | 2.13 |
| 11754601_s_at | SPON2        | spondin 2, extracellular matrix protein                                            | 1.81 | 5.09 | 4.80 |
| 11717885_a_at | CCDC3        | coiled-coil domain containing 3                                                    | 1.81 | 5.05 | 5.05 |
| 11717742_a_at | GPRC5C       | G protein-coupled receptor, family C, group 5, member C                            | 1.80 | 5.52 | 4.25 |
| 11743129_at   | SORL1        | sortilin-related receptor, L(DLR class) A repeats containing                       | 1.80 | 5.22 | 4.14 |
| 11755523_a_at | RBM47        | RNA binding motif protein 47                                                       | 1.78 | 4.83 | 4.24 |
| 11721625_s_at | GLUL         | glutamate-ammonia ligase                                                           | 1.78 | 6.76 | 1.88 |
| 11734271_a_at | CDH18        | cadherin 18, type 2                                                                | 1.77 | 4.41 | 1.01 |
| 11744484_s_at | HLA-DRA      | major histocompatibility complex, class II, DR alpha                               | 1.77 | 5.53 | 2.98 |
| 11729020_at   | ZNF804A      | zinc finger protein 804A                                                           | 1.76 | 4.70 | 0.50 |
| 11746149_x_at | BCHE         | butyrylcholinesterase                                                              | 1.76 | 4.97 | 1.20 |
| 11726192_at   | TFAP2C       | transcription factor AP-2 gamma (activating enhancer binding protein 2 gamma)      | 1.76 | 4.91 | 0.85 |
| 11726333_s_at | LEF1         | lymphoid enhancer-binding factor 1                                                 | 1.75 | 5.14 | 0.04 |
| 11753915_a_at | SEL1L3       | sel-1 suppressor of lin-12-like 3 (C. elegans)                                     | 1.74 | 5.69 | 1.15 |
| 11715893_s_at | IFI27        | interferon, alpha-inducible protein 27                                             | 1.74 | 5.49 | 3.31 |
| 11758166_s_at | KAL1         | Kallmann syndrome 1 sequence                                                       | 1.73 | 6.31 | 2.30 |
| 11730106_a_at | PLCB1        | phospholipase C, beta 1 (phosphoinositide-specific)                                | 1.72 | 4.66 | 1.44 |
| 11719827_a_at | QPCT         | glutamyl-peptide cyclotransferase                                                  | 1.72 | 5.25 | 1.35 |
| 11759295_at   | EHF          | ets homologous factor                                                              | 1.71 | 6.57 | 0.90 |
| 11755908_s_at | IGSF3        | immunoglobulin superfamily, member 3                                               | 1.71 | 5.60 | 3.50 |
| 11732719_at   | EREG         | epiregulin                                                                         | 1.70 | 5.56 | 2.70 |

|               |          |                                                                                     |      |      |      |
|---------------|----------|-------------------------------------------------------------------------------------|------|------|------|
| 11738858_x_at | CSF2RA   | colony stimulating factor 2 receptor, alpha, low-affinity (granulocyte-macrophage)  | 1.70 | 5.15 | 3.40 |
| 11717721_s_at | ST6GAL1  | ST6 beta-galactosamide alpha-2,6-sialyltransferase 1                                | 1.70 | 4.93 | 2.00 |
| 11721454_a_at | SERPINA1 | serpin peptidase inhibitor, clade A (alpha-1 antiproteinase, antitrypsin), member 1 | 1.69 | 4.88 | 4.06 |
| 11743856_a_at | CTHRC1   | collagen triple helix repeat containing 1                                           | 1.69 | 4.77 | 2.34 |
| 11728203_a_at | PHGDH    | phosphoglycerate dehydrogenase                                                      | 1.69 | 4.41 | 0.75 |
| 11719828_x_at | QPCT     | glutaminyl-peptide cyclotransferase                                                 | 1.68 | 5.09 | 1.42 |
| 11716666_a_at | ID3      | inhibitor of DNA binding 3, dominant negative helix-loop-helix protein              | 1.67 | 5.28 | 2.57 |
| 11734938_x_at | CSF2RA   | colony stimulating factor 2 receptor, alpha, low-affinity (granulocyte-macrophage)  | 1.67 | 4.96 | 3.00 |
| 11744776_a_at | NNMT     | nicotinamide N-methyltransferase                                                    | 1.67 | 5.70 | 3.61 |
| 11716663_a_at | GDF15    | growth differentiation factor 15                                                    | 1.67 | 4.82 | 3.14 |
| 11757396_s_at | ANXA8L2  | annexin A8-like 2                                                                   | 1.67 | 5.14 | 3.18 |
| 11751612_a_at | SOCS2    | suppressor of cytokine signaling 2                                                  | 1.67 | 4.81 | 0.34 |
| 11715918_s_at | CD24     | CD24 molecule                                                                       | 1.67 | 5.31 | 1.57 |
| 11730048_at   | SLITRK5  | SLIT and NTRK-like family, member 5                                                 | 1.67 | 4.24 | 0.62 |
| 11722991_a_at | DMD      | dystrophin                                                                          | 1.66 | 4.29 | 1.49 |
| 11715467_s_at | ARHGDI3  | Rho GDP dissociation inhibitor (GDI) beta                                           | 1.66 | 6.44 | 0.39 |
| 11754796_a_at | SLCO3A1  | solute carrier organic anion transporter family, member 3A1                         | 1.66 | 4.64 | 3.38 |
| 11720409_s_at | CYP1B1   | cytochrome P450, family 1, subfamily B, polypeptide 1                               | 1.66 | 5.00 | 2.94 |
| 11727583_a_at | EPHA3    | EPH receptor A3                                                                     | 1.66 | 4.95 | 1.10 |
| 11718506_at   | TFF3     | trefoil factor 3 (intestinal)                                                       | 1.66 | 4.99 | 3.82 |
| 11732158_a_at | ADAMTS1  | ADAM metalloproteinase with thrombospondin type 1 motif, 1                          | 1.65 | 4.38 | 0.01 |
| 11746930_a_at | BHLHE41  | basic helix-loop-helix family, member e41                                           | 1.65 | 4.43 | 0.81 |
| 11719198_s_at | CCND2    | cyclin D2                                                                           | 1.65 | 4.53 | 1.30 |
| 11750552_s_at | CARD16   | caspace recruitment domain family, member 16                                        | 1.65 | 5.45 | 1.58 |
| 11764166_s_at | EHF      | ets homologous factor                                                               | 1.65 | 6.42 | 0.98 |
| 11725515_a_at | ABCG1    | ATP-binding cassette, sub-family G (WHITE), member 1                                | 1.65 | 4.68 | 2.19 |
| 11725516_s_at | ABCG1    | ATP-binding cassette, sub-family G (WHITE), member 1                                | 1.65 | 4.74 | 3.11 |
| 11744718_a_at | CTHRC1   | collagen triple helix repeat containing 1                                           | 1.64 | 4.22 | 1.79 |
| 11742850_x_at | HLA-DRA  | major histocompatibility complex, class II, DR alpha                                | 1.64 | 4.90 | 3.08 |
| 11751745_x_at | PRSS3    | protease, serine, 3                                                                 | 1.64 | 4.58 | 1.11 |
| 11746094_a_at | MPP4     | membrane protein, palmitoylated 4 (MAGUK p55 subfamily member 4)                    | 1.63 | 4.56 | 2.18 |
| 11739094_a_at | CXCR4    | chemokine (C-X-C motif) receptor 4                                                  | 1.62 | 4.92 | 0.97 |
| 11732870_a_at | CASP1    | caspace 1, apoptosis-related cysteine peptidase                                     | 1.62 | 4.48 | 0.87 |
| 11719561_s_at | SOX4     | SRY (sex determining region Y)-box 4                                                | 1.62 | 5.25 | 1.96 |
| 11720277_a_at | OLFML2A  | olfactomedin-like 2A                                                                | 1.62 | 5.06 | 4.09 |
| 11733091_a_at | TSPAN8   | tetraspanin 8                                                                       | 1.62 | 5.10 | 1.98 |
| 11741453_at   | SPINK4   | serine peptidase inhibitor, Kazal type 4                                            | 1.61 | 4.46 | 3.97 |
| 11718620_a_at | CHRDL1   | chordin-like 1                                                                      | 1.61 | 4.45 | 1.32 |
| 11759905_a_at | EXD3     | exonuclease 3'-5' domain containing 3                                               | 1.60 | 4.66 | 4.39 |
| 11726396_x_at | KAL1     | Kallmann syndrome 1 sequence                                                        | 1.60 | 5.80 | 2.29 |
| 11719447_s_at | GBP2     | guanylate binding protein 2, interferon-inducible                                   | 1.59 | 4.63 | 3.07 |
| 11740782_a_at | RNF128   | ring finger protein 128, E3 ubiquitin protein ligase                                | 1.59 | 4.36 | 3.69 |
| 11743197_at   | TLR4     | toll-like receptor 4                                                                | 1.59 | 4.81 | 1.60 |
| 11745722_x_at | FHL1     | four and a half LIM domains 1                                                       | 1.59 | 5.55 | 2.43 |
| 11715624_at   | SH3BGR1  | SH3 domain binding glutamic acid-rich protein like                                  | 1.59 | 6.73 | 0.80 |
| 11725058_a_at | NEDD9    | neural precursor cell expressed, developmentally down-regulated 9                   | 1.58 | 4.32 | 3.70 |
| 11726458_s_at | GSPT2    | G1 to S phase transition 2                                                          | 1.58 | 4.75 | 2.95 |
| 11738935_a_at | KLRC3    | killer cell lectin-like receptor subfamily C, member 3                              | 1.58 | 5.01 | 4.65 |
| 11744079_s_at | PRSS2    | protease, serine, 2 (trypsin 2)                                                     | 1.58 | 5.79 | 4.28 |
| 11746463_a_at | IL6      | interleukin 6 (interferon, beta 2)                                                  | 1.58 | 5.53 | 4.82 |
| 11747104_s_at | CYP1B1   | cytochrome P450, family 1, subfamily B, polypeptide 1                               | 1.58 | 4.49 | 3.13 |
| 11720410_s_at | CYP1B1   | cytochrome P450, family 1, subfamily B, polypeptide 1                               | 1.58 | 4.90 | 2.66 |
| 11718904_s_at | FILIP1L  | filamin A interacting protein 1-like                                                | 1.58 | 5.96 | 2.17 |
| 11755282_a_at | SCNN1A   | sodium channel, non-voltage-gated 1 alpha subunit                                   | 1.58 | 4.51 | 4.20 |
| 11732993_a_at | RGS4     | regulator of G-protein signaling 4                                                  | 1.58 | 5.30 | 1.31 |
| 11726559_s_at | LCP1     | lymphocyte cytosolic protein 1 (L-plastin)                                          | 1.58 | 5.31 | 2.47 |
| 11730184_at   | CST1     | cystatin SN                                                                         | 1.58 | 5.16 | 3.45 |
| 11750623_a_at | FILIP1L  | filamin A interacting protein 1-like                                                | 1.57 | 5.31 | 2.67 |
| 11731465_a_at | CTSC     | cathepsin C                                                                         | 1.57 | 4.41 | 0.00 |
| 11744848_x_at | PRR16    | proline rich 16                                                                     | 1.57 | 4.79 | 0.28 |
| 11755141_a_at | CACNA2D4 | calcium channel, voltage-dependent, alpha 2/delta subunit 4                         | 1.57 | 4.72 | 3.24 |
| 11718347_a_at | S100P    | S100 calcium binding protein P                                                      | 1.57 | 4.87 | 3.26 |
| 11758952_at   | AGR2     | anterior gradient 2 homolog (Xenopus laevis)                                        | 1.56 | 4.68 | 3.30 |
| 11742873_a_at | CDH11    | cadherin 11, type 2, OB-cadherin (osteoblast)                                       | 1.56 | 4.71 | 2.14 |
| 11729348_at   | HMG5     | high mobility group nucleosome binding domain 5                                     | 1.56 | 4.52 | 0.84 |
| 11742923_a_at | LAPTM5   | lysosomal protein transmembrane 5                                                   | 1.56 | 5.59 | 2.30 |
| 11726678_a_at | AFAP1L2  | actin filament associated protein 1-like 2                                          | 1.56 | 5.53 | 2.95 |
| 11720411_s_at | CYP1B1   | cytochrome P450, family 1, subfamily B, polypeptide 1                               | 1.56 | 4.84 | 2.70 |





|               |          |                                                                                        |      |       |               |       |                |             |                 |       |
|---------------|----------|----------------------------------------------------------------------------------------|------|-------|---------------|-------|----------------|-------------|-----------------|-------|
| 11722348_a_at | REP52    | RALBP1 associated Eps domain containing 2                                              | LT>T | 2.01  | 1.12E-03 T>M' | 0.32  | 5.89E-01 LT>M' | <b>2.33</b> | <b>1.38E-06</b> | TRUE  |
| 11732625_a_at | RIMS1    | regulating synaptic membrane exocytosis 1                                              | T>LT | -0.50 | 4.59E-02 M>T  | -1.85 | 2.82E-04 M>LT  | -2.35       | 3.51E-08        | TRUE  |
| 11736729_a_at | RIMS2    | regulating synaptic membrane exocytosis 2                                              | T>LT | 0.00  | 1.00E+00 M>T  | -3.15 | 1.21E-02 M>LT  | -3.15       | 7.87E-04        | TRUE  |
| 11736730_a_at | RIMS2    | regulating synaptic membrane exocytosis 2                                              | LT>T | 0.24  | 7.91E-01 M>T  | -3.34 | 9.85E-03 M>LT  | -3.10       | 9.81E-04        | TRUE  |
| 11757347_s_at | RNF144A  | ring finger protein 144A                                                               | LT>T | 2.47  | 3.31E-03 T>M' | 0.01  | 9.54E-01 LT>M' | 2.48        | 6.37E-03        | TRUE  |
| 11758227_s_at | ROBO1    | roundabout, axon guidance receptor, homolog 1 (Drosophila)                             | T>LT | -3.04 | 3.23E-03 M>T  | -0.93 | 2.16E-02 M>LT  | -3.98       | 1.40E-03        | TRUE  |
| 11718347_x_at | S100P    | S100 calcium binding protein P                                                         | T>LT | -2.38 | 1.58E-02 T>M' | 2.04  | 9.46E-02 M>LT  | -0.35       | 2.59E-01        | TRUE  |
| 11733442_x_at | SAA1     | serum amyloid A1                                                                       | LT>T | 0.61  | 4.54E-01 T>M' | 1.79  | 3.47E-02 LT>M' | 2.40        | 6.18E-03        | TRUE  |
| 11756072_s_at | SAA1     | serum amyloid A1                                                                       | LT>T | 0.69  | 4.23E-01 T>M' | 2.66  | 1.61E-02 LT>M' | 3.35        | 1.31E-03        | TRUE  |
| 11755282_a_at | SCNN1A   | sodium channel, non-voltage-gated 1 alpha subunit                                      | LT>T | 1.33  | 9.16E-02 T>M' | 1.73  | 3.95E-02 LT>M' | 3.06        | 3.41E-04        | TRUE  |
| 11754879_a_at | SDR16C5  | short chain dehydrogenase/reductase family 16C, member 5                               | T>LT | -3.86 | 2.67E-03 T>M' | 1.23  | 3.70E-01 M>LT  | -2.63       | 4.36E-04        | TRUE  |
| 11753915_a_at | SELLL3   | sel-1 suppressor of lin-12-like 3 (C. elegans)                                         | T>LT | -1.38 | 1.35E-01 M>T  | -1.53 | 1.79E-01 M>LT  | -2.91       | 3.50E-03        | TRUE  |
| 11730390_at   | SEMA3A   | sema domain, immunoglobulin domain (Ig), short basic domain, secreted, (semaphorin) 3A | T>LT | -1.77 | 1.13E-02 M>T  | -0.56 | 3.30E-01 M>LT  | -2.33       | 3.63E-03        | TRUE  |
| 11721454_a_at | SERPINA1 | serpin peptidase inhibitor, clade A (alpha-1 antiproteinase, antitrypsin), member 1    | LT>T | 2.11  | 3.99E-02 T>M' | 0.58  | 4.50E-01 LT>M' | 2.69        | 8.76E-03        | TRUE  |
| 11721455_s_at | SERPINA1 | serpin peptidase inhibitor, clade A (alpha-1 antiproteinase, antitrypsin), member 1    | LT>T | 1.82  | 2.94E-02 T>M' | 0.52  | 4.10E-01 LT>M' | 2.34        | 5.20E-03        | TRUE  |
| 11744315_at   | SGK223   | homolog of rat pragra of Rnd2                                                          | LT>T | 0.27  | 2.86E-01 T>M' | 2.21  | 2.82E-03 LT>M' | 2.48        | 2.72E-04        | TRUE  |
| 11718447_s_at | SH3BGR2  | SH3 domain binding glutamic acid-rich protein like 2                                   | T>LT | -1.60 | 2.96E-03 M>T  | -1.23 | 3.56E-02 M>LT  | -2.82       | 3.06E-07        | FALSE |
| 11726188_at   | SHISA3   | shisa homolog 3 (Xenopus laevis)                                                       | T>LT | -2.83 | 2.08E-03 M>T  | -0.62 | 5.24E-01 M>LT  | -3.45       | 1.17E-05        | TRUE  |
| 11729140_at   | SLAMF7   | SLAM family member 7                                                                   | T>LT | -3.20 | 1.38E-03 T>M' | 2.13  | 2.46E-03 M>LT  | -1.08       | 1.14E-02        | TRUE  |
| 11749023_a_at | SLC16A4  | solute carrier family 16, member 4 (monocarboxylic acid transporter 5)                 | LT>T | 2.63  | 1.18E-03 M>T  | 0.04  | 6.66E-01 LT>M' | 2.58        | 3.47E-03        | TRUE  |
| 11749024_x_at | SLC16A4  | solute carrier family 16, member 4 (monocarboxylic acid transporter 5)                 | LT>T | 2.36  | 2.71E-03 T>M' | 0.04  | 6.24E-01 LT>M' | 2.40        | 6.11E-03        | TRUE  |
| 11733491_a_at | SLC44A5  | solute carrier family 44, member 5                                                     | T>LT | -2.12 | 5.61E-03 M>T  | -0.54 | 5.10E-01 M>LT  | -2.66       | 2.29E-06        | TRUE  |
| 11733492_s_at | SLC44A5  | solute carrier family 44, member 5                                                     | T>LT | -2.30 | 3.01E-03 M>T  | -0.31 | 7.07E-01 M>LT  | -2.62       | 7.93E-05        | FALSE |
| 11747964_a_at | SLC47A   | solute carrier family 7, sodium bicarbonate cotransporter, member 7                    | T>LT | -1.72 | 1.56E-03 M>T  | -0.98 | 1.04E-01 M>LT  | -2.70       | 9.29E-04        | TRUE  |
| 11733042_at   | SLC7A2   | solute carrier family 7 (cationic amino acid transporter, y+ system), member 2         | T>LT | -1.11 | 4.80E-02 M>T  | -1.24 | 7.87E-02 M>LT  | -2.36       | 1.41E-04        | TRUE  |
| 11732569_at   | SLC10B3  | solute carrier organic anion transporter family, member 1B3                            | T>LT | -2.88 | 3.19E-03 M>T  | -1.21 | 3.29E-02 M>LT  | -4.08       | 4.32E-04        | TRUE  |
| 11754796_a_at | SLC30A1  | solute carrier organic anion transporter family, member 3A1                            | T>LT | 1.77  | 3.20E-02 T>M' | 1.50  | 1.28E-01 LT>M' | 3.27        | 4.59E-07        | TRUE  |
| 11758172_s_at | SLC30A1  | solute carrier organic anion transporter family, member 3A1                            | LT>T | 1.18  | 1.52E-02 T>M' | 1.25  | 2.82E-02 LT>M' | 2.43        | 1.17E-06        | TRUE  |
| 11730048_at   | SLITRK5  | SLIT and NTRK-like family, member 5                                                    | T>LT | -1.84 | 2.61E-02 M>T  | -1.43 | 1.05E-01 M>LT  | -3.28       | 3.99E-05        | TRUE  |
| 11725808_x_at | SNAIP1   | synuclein, alpha interacting protein                                                   | T>LT | -0.19 | 5.04E-01 M>T  | -2.29 | 3.42E-03 M>LT  | -2.48       | 1.47E-03        | TRUE  |
| 11747095_x_at | SNAIP1   | synuclein, alpha interacting protein                                                   | T>LT | -0.10 | 7.08E-01 M>T  | -2.56 | 2.79E-03 M>LT  | -2.66       | 1.12E-03        | TRUE  |
| 11750730_x_at | SNAIP1   | synuclein, alpha interacting protein                                                   | T>LT | -0.11 | 6.83E-01 M>T  | -2.40 | 3.70E-03 M>LT  | -2.51       | 1.11E-03        | TRUE  |
| 11735148_a_at | SOC22    | suppressor of cytokine signaling 2                                                     | T>LT | -3.02 | 8.86E-04 M>T  | -0.76 | 8.50E-02 M>LT  | -3.78       | 3.29E-04        | TRUE  |
| 11751612_x_at | SOC22    | suppressor of cytokine signaling 2                                                     | T>LT | -2.58 | 1.02E-03 M>T  | -0.71 | 1.19E-01 M>LT  | -3.29       | 2.86E-04        | FALSE |
| 11735570_a_at | SORBS2   | sorbin and SH3 domain containing 2                                                     | LT>T | 0.59  | 3.43E-01 T>M' | 1.98  | 9.55E-03 LT>M' | 2.57        | 5.67E-04        | TRUE  |
| 11758588_x_at | SORCS2   | sorilin-related VPS10 domain containing receptor 2                                     | LT>T | 2.85  | 2.87E-08 T>M' | 0.35  | 8.22E-02 LT>M' | 3.20        | 3.25E-09        | FALSE |
| 11743129_at   | SORL1    | sorilin-related receptor, (LDLR class) A repeats containing                            | LT>T | 1.97  | 1.75E-04 T>M' | 2.19  | 9.35E-04 LT>M' | 4.16        | 6.25E-07        | FALSE |
| 11743130_at   | SORL1    | sorilin-related receptor, (LDLR class) A repeats containing                            | LT>T | 1.77  | 9.93E-05 T>M' | 1.80  | 1.10E-03 LT>M' | 3.57        | 1.69E-07        | TRUE  |
| 11719560_at   | SOX4     | SRY (sex determining region Y)-box 4                                                   | T>LT | -2.89 | 2.54E-04 T>M' | 1.20  | 4.93E-02 M>LT  | -1.69       | 4.13E-03        | TRUE  |
| 11719561_s_at | SOX4     | SRY (sex determining region Y)-box 4                                                   | T>LT | -3.16 | 2.96E-04 T>M' | 1.12  | 5.35E-02 M>LT  | -2.04       | 5.65E-03        | TRUE  |
| 11719562_at   | SOX4     | SRY (sex determining region Y)-box 4                                                   | T>LT | -4.17 | 7.58E-05 T>M' | 0.66  | 1.74E-01 M>LT  | -3.51       | 6.32E-04        | TRUE  |
| 11757741_s_at | SOX4     | SRY (sex determining region Y)-box 4                                                   | T>LT | -2.40 | 4.98E-05 T>M' | 0.63  | 1.01E-01 M>LT  | -1.78       | 5.62E-04        | TRUE  |
| 11758525_s_at | SOX4     | SRY (sex determining region Y)-box 4                                                   | T>LT | -3.81 | 9.37E-05 T>M' | 0.75  | 9.33E-02 M>LT  | -3.06       | 1.05E-03        | FALSE |
| 11726177_s_at | SPANXB2  | SPANX family, member B2                                                                | T>LT | -6.74 | 1.52E-05 T>M' | 0.34  | 8.42E-01 M>LT  | -6.40       | 7.02E-04        | FALSE |
| 11738785_at   | SPANXB2  | SPANX family, member B2                                                                | T>LT | -7.69 | 1.27E-06 T>M' | 0.48  | 7.33E-01 M>LT  | -7.20       | 2.46E-04        | FALSE |
| 11738786_x_at | SPANXB2  | SPANX family, member B2                                                                | T>LT | -7.21 | 5.43E-06 T>M' | 0.34  | 8.33E-01 M>LT  | -6.87       | 3.69E-04        | FALSE |
| 11731995_x_at | SPANXC   | SPANX family, member C                                                                 | T>LT | -1.20 | 8.77E-04 M>T  | -2.78 | 2.92E-02 M>LT  | -3.98       | 1.98E-03        | FALSE |
| 11731130_at   | SPANXE   | SPANX family, member E                                                                 | T>LT | -0.62 | 4.61E-02 M>T  | -1.94 | 8.02E-02 M>LT  | -2.57       | 1.41E-02        | TRUE  |
| 11731994_s_at | SPANXE   | SPANX family, member E                                                                 | T>LT | -2.39 | 1.09E-01 M>T  | -5.59 | 1.71E-02 M>LT  | -7.97       | 6.16E-07        | TRUE  |
| 11759051_x_at | SPANXE   | SPANX family, member E                                                                 | T>LT | -0.60 | 1.01E-01 M>T  | -1.90 | 7.01E-02 M>LT  | -2.49       | 9.32E-03        | TRUE  |
| 11741453_x    | SPINK4   | serine peptidase inhibitor, Kazal type 4                                               | LT>T | 1.94  | 4.84E-03 T>M' | 1.51  | 4.60E-02 LT>M' | 3.45        | 4.54E-07        | TRUE  |
| 11754601_s_at | SPON2    | spondin 2, extracellular matrix protein                                                | T>LT | 2.92  | 3.07E-03 T>M' | 0.18  | 4.67E-01 LT>M' | 3.10        | 4.95E-03        | TRUE  |
| 11742710_a_at | SRGN     | serglycin                                                                              | T>LT | -3.97 | 1.06E-03 M>T  | -1.37 | 4.31E-02 M>LT  | -5.34       | 1.64E-04        | FALSE |
| 11717721_s_at | ST6GAL1  | ST6 beta-galactosidase alpha-2,6-sialyltransferase 1                                   | T>LT | -2.94 | 1.55E-03 T>M' | 0.73  | 4.08E-01 M>LT  | -2.21       | 9.59E-03        | TRUE  |
| 11716055_s_at | STMN3    | stathmin-like 3                                                                        | LT>T | 1.33  | 1.67E-02 T>M' | 1.10  | 3.92E-02 LT>M' | 2.42        | 1.44E-04        | FALSE |
| 11733461_at   | SUSO5    | sushi domain containing 5                                                              | T>LT | -2.84 | 3.14E-03 M>T  | -1.40 | 1.77E-01 M>LT  | -4.24       | 2.68E-05        | TRUE  |
| 11717301_at   | TACSTD2  | tumor-associated calcium signal transducer 2                                           | LT>T | 1.96  | 6.44E-04 T>M' | 1.40  | 9.50E-03 LT>M' | 3.36        | 2.79E-06        | TRUE  |
| 11727984_at   | TENM3    | tenascin transmembrane protein 3                                                       | T>LT | -2.56 | 3.97E-02 M>T  | -0.85 | 2.26E-01 M>LT  | -3.41       | 1.27E-02        | TRUE  |
| 11726192_at   | TFA2P2C  | transcription factor AP-2 gamma (activating enhancer binding protein 2 gamma)          | T>LT | -1.59 | 8.94E-02 M>T  | -1.68 | 1.27E-01 M>LT  | -3.27       | 3.48E-05        | TRUE  |
| 11726812_a_at | TFPI1    | trefoil factor 1                                                                       | T>LT | -3.19 | 1.49E-02 T>M' | 2.39  | 1.53E-01 M>LT  | -0.80       | 2.42E-01        | TRUE  |
| 11723751_at   | TFPI2    | trefoil factor 2                                                                       | T>LT | -2.44 | 2.64E-02 T>M' | 2.86  | 4.47E-02 LT>M' | 0.42        | 5.47E-01        | TRUE  |
| 11718506_at   | TFPI3    | trefoil factor 3 (intestinal)                                                          | T>LT | -2.54 | 1.23E-02 T>M' | 2.54  | 4.20E-02 M>LT  | 0.00        | 9.98E-01        | TRUE  |
| 11728302_at   | TGFA     | transforming growth factor, alpha                                                      | LT>T | 0.57  | 6.78E-02 T>M' | 1.77  | 1.03E-02 LT>M' | 2.34        | 8.76E-04        | TRUE  |
| 11734548_a_at | TGFB1    | transforming growth factor, beta-induced, 68kDa                                        | LT>T | 1.29  | 2.94E-02 T>M' | 1.14  | 6.49E-02 LT>M' | 2.44        | 1.11E-03        | TRUE  |
| 11734549_s_at | TGFB1    | transforming growth factor, beta-induced, 68kDa                                        | LT>T | 1.21  | 5.38E-02 T>M' | 1.22  | 1.04E-01 LT>M' | 2.42        | 2.80E-03        | TRUE  |
| 11734550_x_at | TGFB1    | transforming growth factor, beta-induced, 68kDa                                        | LT>T | 1.24  | 4.26E-02 T>M' | 1.27  | 7.53E-02 LT>M' | 2.51        | 1.47E-03        | TRUE  |
| 11743197_at   | TLR4     | toll-like receptor 4                                                                   | T>LT | -3.05 | 1.16E-04 T>M' | 0.50  | 2.32E-01 M>LT  | -2.55       | 7.18E-04        | FALSE |
| 11731603_at   | TMEM154  | transmembrane protein 154                                                              | T>LT | -1.31 | 1.03E-02 M>T  | -1.24 | 1.59E-03 M>LT  | -2.55       | 5.68E-04        | TRUE  |
| 11758583_s_at | TMEM154  | transmembrane protein 154                                                              | T>LT | -1.42 | 2.41E-02 M>T  | -1.05 | 1.65E-02 M>LT  | -2.48       | 2.89E-03        | TRUE  |
| 11739809_at   | TMEM156  | transmembrane protein 156                                                              | T>LT | -3.40 | 2.57E-06 M>T  | -0.48 | 2.51E-01 M>LT  | -3.88       | 3.90E-08        | TRUE  |
| 11740091_s_at | TMEM163  | transmembrane protein 163                                                              | T>LT | -2.22 | 6.20E-02 M>T  | -0.55 | 6.90E-01 M>LT  | -2.77       | 1.48E-05        | TRUE  |
| 11758102_s_at | TMEM163  | transmembrane protein 163                                                              | T>LT | -2.72 | 3.90E-02 M>T  | -0.27 | 6.32E-01 M>LT  | -3.42       | 3.30E-06        | TRUE  |
| 11743730_at   | TNFSF10  | tumor necrosis factor (ligand) superfamily, member 10                                  | LT>T | 3.31  | 8.67E-05 T>M' | 0.71  | 4.90E-03 LT>M' | 5.57        | 1.50E-08        | TRUE  |
| 11743731_a_at | TNFSF10  | tumor necrosis factor (ligand) superfamily, member 10                                  | LT>T | 3.17  | 1.75E-05 T>M' | 2.26  | 5.61E-04 LT>M' | 5.43        | 1.35E-07        | FALSE |
| 11747952_x_at | TNFSF10  | tumor necrosis factor (ligand) superfamily, member 10                                  | LT>T | 3.41  | 1.06E-04 T>M' | 2.48  | 4.95E-03 LT>M' | 5.89        | 1.51E-08        | FALSE |
| 11733091_a_at | TSPAN8   | tetraspanin 8                                                                          | T>LT | -3.09 | 2.49E-04 T>M' | 0.73  | 1.96E-01 M>LT  | -2.35       | 1.54E-03        | TRUE  |
| 11755851_a_at | UBR4     | ubiquitin protein ligase E3 component n-recognin 4                                     | T>LT | -1.04 | 8.16E-03 M>T  | -1.33 | 4.35E-03 M>LT  | -2.37       | 4.41E-05        | TRUE  |
| 11758628_x_at | ULK2     | unc-51-like kinase 2 (C. elegans)                                                      | LT>T | 1.80  | 6.52E-03 T>M' | 0.70  | 2.86E-01 LT>M' | 2.50        | 1.27E-03        | FALSE |
| 11732465_a_at | USP44    | ubiquitin specific peptidase 44                                                        | T>LT | -1.15 | 9.18E-03 M>T  | -1.29 | 1.14E-02 M>LT  | -2.44       | 4.19E-06        | TRUE  |
| 11740301_a_at | USP44    | ubiquitin specific peptidase 44                                                        | T>LT | -1.33 | 1.78E-03 M>T  | -1.31 | 9.22E-03 M>LT  | -2.64       | 4.26E-07        | TRUE  |
| 11724795_at   | ZG16B    | zymogen granule protein 16B                                                            | T>LT | -3.58 | 3.74E-03 T>M' | 2.74  | 5.15E-02 M>LT  | -0.84       | 4.88E-04        | TRUE  |
| 11729410_a_at | ZNF415   | zinc finger protein 415                                                                | LT>T | 0.80  | 7.29E-02 T>M' | 1.61  | 4.06E-02 LT>M' | 2.41        | 9.09E-04        | FALSE |
| 11729020_at   | ZNF804A  | zinc finger protein 804A                                                               | T>LT | -2.03 | 2.04E-04 M>T  | -2.06 | 9.23E-04 M>LT  | -4.09       | 6.38E-08        | FALSE |

\* Threshold value for Fold difference is 2.32 in log2 and P < 0.05; Genes that have significant difference between Groups are highlighted in red



**Table S4. List of genes affiliated with regulation of cell shape.**

|                   |                                                                   |
|-------------------|-------------------------------------------------------------------|
| CLU(LT>M')        | clusterin                                                         |
| COCH(LT>M')       | coagulation factor C homolog, cochlin (Limulus polyphemus)        |
| DCLK1(M'>T,M'>LT) | doublecortin-like kinase 1                                        |
| DOCK10(M'>LT)     | dedicator of cytokinesis 10                                       |
| GJA1(M'>LT)       | gap junction protein, alpha 1, 43kDa                              |
| HAS2(M'>LT)       | hyaluronan synthase 2                                             |
| ICAM1(LT>M')      | intercellular adhesion molecule 1                                 |
| IL6(LT>M')        | interleukin 6 (interferon, beta 2)                                |
| IL7R(M'>LT)       | interleukin 7 receptor                                            |
| LEF1(T>LT,M'>LT)  | lymphoid enhancer-binding factor 1                                |
| MAP2(LT>T)        | microtubule-associated protein 2                                  |
| NRXN3(M'>LT)      | neurexin 3                                                        |
| NTN4(T>LT,M'>LT)  | netrin 4                                                          |
| PARD6B(LT>M')     | par-6 partitioning defective 6 homolog beta (C. elegans)          |
| RIMS1(M'>LT)      | regulating synaptic membrane exocytosis 1                         |
| RIMS2(M'>T,M'>LT) | regulating synaptic membrane exocytosis 2                         |
| ROBO1(T>LT,M'>LT) | roundabout, axon guidance receptor, homolog 1 (Drosophila)        |
| SEMA3A(M'>LT)     | sema domain, immunoglobulin domain (Ig), short basic domain, secr |
| SLITRK5(M'>LT)    | SLIT and NTRK-like family, member 5                               |
| SPON2(LT>T,LT>M') | spondin 2, extracellular matrix protein                           |
| TACSTD2(LT>M')    | tumor-associated calcium signal transducer 2                      |
| ULK2(LT>M')       | unc-51-like kinase 2 (C. elegans)                                 |

**Table S5. Summary of CM features.**

| Feature name | Feature category   | shape type | Feature description                            |
|--------------|--------------------|------------|------------------------------------------------|
| f1           | Basic              | Nucleus    | area                                           |
| f2           | Basic              | Nucleus    | perimeter                                      |
| f3           | Basic              | Nucleus    | long axis length                               |
| f4           | Basic              | Nucleus    | short axis length                              |
| f5           | Basic              | Nucleus    | angle                                          |
| f6           | Basic              | Nucleus    | solidity                                       |
| f7           | Basic              | Nucleus    | equi diameter                                  |
| f8           | Basic              | Nucleus    | aspect ratio                                   |
| f9           | Basic              | Nucleus    | circularity                                    |
| f10          | Basic              | Nucleus    | roundness                                      |
| f11          | Basic              | Cell       | area                                           |
| f12          | Basic              | Cell       | perimeter                                      |
| f13          | Basic              | Cell       | long axis length                               |
| f14          | Basic              | Cell       | short axis length                              |
| f15          | Basic              | Cell       | angle                                          |
| f16          | Basic              | Cell       | solidity                                       |
| f17          | Basic              | Cell       | equi diameter                                  |
| f18          | Basic              | Cell       | aspect ratio                                   |
| f19          | Basic              | Cell       | circularity                                    |
| f20          | Basic              | Cell       | roundness                                      |
| f21          | Boundary signature | Nucleus    | mean(R) ( $\equiv \langle R \rangle$ )         |
| f22          | Boundary signature | Nucleus    | median(R)                                      |
| f23          | Boundary signature | Nucleus    | mode(R)                                        |
| f24          | Boundary signature | Nucleus    | maR(R)                                         |
| f25          | Boundary signature | Nucleus    | min(R)                                         |
| f26          | Boundary signature | Nucleus    | 25% percentile (R)                             |
| f27          | Boundary signature | Nucleus    | 75% percentile (R)                             |
| f28          | Boundary signature | Nucleus    | mean(R(R > f27));                              |
| f29          | Boundary signature | Nucleus    | mean(R(R < f26));                              |
| f30          | Boundary signature | Nucleus    | $\Sigma(R)$                                    |
| f31          | Boundary signature | Nucleus    | harmonic mean(R)                               |
| f32          | Boundary signature | Nucleus    | 3% trimmed mean(R)                             |
| f33          | Boundary signature | Nucleus    | 5% trimmed mean(R)                             |
| f34          | Boundary signature | Nucleus    | 15% trimmed mean(R)                            |
| f35          | Boundary signature | Nucleus    | 25% trimmed mean(R)                            |
| f36          | Boundary signature | Nucleus    | standard deviation(R) ( $\equiv \sigma_R$ )    |
| f37          | Boundary signature | Nucleus    | $\sigma_R / \langle R \rangle$                 |
| f38          | Boundary signature | Nucleus    | $\sigma_R /  \text{median}(R) $                |
| f39          | Boundary signature | Nucleus    | $\sigma_R /  \text{mode}(R) $                  |
| f40          | Boundary signature | Nucleus    | skewness(R)                                    |
| f41          | Boundary signature | Nucleus    | kurtosis(R)                                    |
| f42          | Boundary signature | Nucleus    | mean( R - $\langle R \rangle$  )               |
| f43          | Boundary signature | Nucleus    | range(X)                                       |
| f44          | Boundary signature | Nucleus    | interquartile range (X)                        |
| f45          | Boundary signature | Nucleus    | $\Sigma(R^2)$                                  |
| f46          | Boundary signature | Nucleus    | $\Sigma(R^3)$                                  |
| f47          | Boundary signature | Nucleus    | mean(R <sup>2</sup> )                          |
| f48          | Boundary signature | Nucleus    | mean(R <sup>3</sup> )                          |
| f49          | Boundary signature | Nucleus    | mean(R <sup>4</sup> )                          |
| f50          | Boundary signature | Nucleus    | mean(R <sup>5</sup> )                          |
| f51          | Boundary signature | Nucleus    | $\Sigma( R - \langle R \rangle ^2)$            |
| f52          | Boundary signature | Nucleus    | $\Sigma( R - \langle R \rangle ^3)$            |
| f53          | Boundary signature | Nucleus    | mean( R - $\langle R \rangle$   <sup>2</sup> ) |
| f54          | Boundary signature | Nucleus    | mean( R - $\langle R \rangle$   <sup>3</sup> ) |
| f55          | Boundary signature | Nucleus    | mean( R - $\langle R \rangle$   <sup>4</sup> ) |
| f56          | Boundary signature | Nucleus    | mean( R - $\langle R \rangle$   <sup>5</sup> ) |
| f57          | Boundary signature | Nucleus    | number of peaks                                |
| f58          | Boundary signature | Nucleus    | gini coefficient (R)                           |
| f59          | Boundary signature | Cell       | mean(R) ( $\equiv \langle R \rangle$ )         |
| f60          | Boundary signature | Cell       | median(R)                                      |
| f61          | Boundary signature | Cell       | mode(R)                                        |
| f62          | Boundary signature | Cell       | maR(R)                                         |
| f63          | Boundary signature | Cell       | min(R)                                         |
| f64          | Boundary signature | Cell       | 25% percentile (R)                             |
| f65          | Boundary signature | Cell       | 75% percentile (R)                             |
| f66          | Boundary signature | Cell       | mean(R(R > f65));                              |
| f67          | Boundary signature | Cell       | mean(R(R < f64));                              |
| f68          | Boundary signature | Cell       | $\Sigma(R)$                                    |

|      |                    |         |                                                           |
|------|--------------------|---------|-----------------------------------------------------------|
| f69  | Boundary signature | Cell    | harmonic mean(R)                                          |
| f70  | Boundary signature | Cell    | 3% trimmed mean(R)                                        |
| f71  | Boundary signature | Cell    | 5% trimmed mean(R)                                        |
| f72  | Boundary signature | Cell    | 15% trimmed mean(R)                                       |
| f73  | Boundary signature | Cell    | 25% trimmed mean(R)                                       |
| f74  | Boundary signature | Cell    | standard deviation(R) ( $\equiv \sigma_R$ )               |
| f75  | Boundary signature | Cell    | $\sigma_R/ <R> $                                          |
| f76  | Boundary signature | Cell    | $\sigma_R/ \text{median}(R) $                             |
| f77  | Boundary signature | Cell    | $\sigma_R/ \text{mode}(R) $                               |
| f78  | Boundary signature | Cell    | skewness(R)                                               |
| f79  | Boundary signature | Cell    | kurtosis(R)                                               |
| f80  | Boundary signature | Cell    | mean( R-<R> )                                             |
| f81  | Boundary signature | Cell    | range(X)                                                  |
| f82  | Boundary signature | Cell    | interquartile range (X)                                   |
| f83  | Boundary signature | Cell    | $\Sigma(R^2)$                                             |
| f84  | Boundary signature | Cell    | $\Sigma(R^3)$                                             |
| f85  | Boundary signature | Cell    | mean( $R^2$ )                                             |
| f86  | Boundary signature | Cell    | mean( $R^3$ )                                             |
| f87  | Boundary signature | Cell    | mean( $R^4$ )                                             |
| f88  | Boundary signature | Cell    | mean( $R^5$ )                                             |
| f89  | Boundary signature | Cell    | $\Sigma( R-<R> ^2)$                                       |
| f90  | Boundary signature | Cell    | $\Sigma( R-<R> ^3)$                                       |
| f91  | Boundary signature | Cell    | mean( R-<R> ^2)                                           |
| f92  | Boundary signature | Cell    | mean( R-<R> ^3)                                           |
| f93  | Boundary signature | Cell    | mean( R-<R> ^4)                                           |
| f94  | Boundary signature | Cell    | mean( R-<R> ^5)                                           |
| f95  | Boundary signature | Cell    | number of peaks                                           |
| f96  | Boundary signature | Cell    | gini coefficient (R)                                      |
| f97  | Curvature          | Nucleus | mean( $\kappa$ ) ( $\equiv \langle \kappa \rangle$ )      |
| f98  | Curvature          | Nucleus | median( $\kappa$ )                                        |
| f99  | Curvature          | Nucleus | mode( $\kappa$ )                                          |
| f100 | Curvature          | Nucleus | max( $\kappa$ )                                           |
| f101 | Curvature          | Nucleus | min( $\kappa$ )                                           |
| f102 | Curvature          | Nucleus | 25% percentile ( $\kappa$ )                               |
| f103 | Curvature          | Nucleus | 75% percentile ( $\kappa$ )                               |
| f104 | Curvature          | Nucleus | mean( $\kappa(\kappa > f103)$ );                          |
| f105 | Curvature          | Nucleus | mean( $\kappa(\kappa < f102)$ );                          |
| f106 | Curvature          | Nucleus | $\Sigma(\kappa)$                                          |
| f107 | Curvature          | Nucleus | harmonic mean( $\kappa$ )                                 |
| f108 | Curvature          | Nucleus | 3% trimmed mean( $\kappa$ )                               |
| f109 | Curvature          | Nucleus | 5% trimmed mean( $\kappa$ )                               |
| f110 | Curvature          | Nucleus | 15% trimmed mean( $\kappa$ )                              |
| f111 | Curvature          | Nucleus | 25% trimmed mean( $\kappa$ )                              |
| f112 | Curvature          | Nucleus | standard deviation( $\kappa$ ) ( $\equiv \sigma_\kappa$ ) |
| f113 | Curvature          | Nucleus | $\sigma_\kappa/ \langle \kappa \rangle $                  |
| f114 | Curvature          | Nucleus | $\sigma_\kappa/ \text{median}(\kappa) $                   |
| f115 | Curvature          | Nucleus | $\sigma_\kappa/ \text{mode}(\kappa) $                     |
| f116 | Curvature          | Nucleus | skewness( $\kappa$ )                                      |
| f117 | Curvature          | Nucleus | kurtosis( $\kappa$ )                                      |
| f118 | Curvature          | Nucleus | mean(  $\kappa-\langle \kappa \rangle$  )                 |
| f119 | Curvature          | Nucleus | range( $\kappa$ )                                         |
| f120 | Curvature          | Nucleus | interquartile range ( $\kappa$ )                          |
| f121 | Curvature          | Nucleus | $\Sigma(\kappa^2)$                                        |
| f122 | Curvature          | Nucleus | $\Sigma(\kappa^3)$                                        |
| f123 | Curvature          | Nucleus | mean( $\kappa^2$ )                                        |
| f124 | Curvature          | Nucleus | mean( $\kappa^3$ )                                        |
| f125 | Curvature          | Nucleus | mean( $\kappa^4$ )                                        |
| f126 | Curvature          | Nucleus | mean( $\kappa^5$ )                                        |
| f127 | Curvature          | Nucleus | $\Sigma( \kappa-\langle \kappa \rangle ^2)$               |
| f128 | Curvature          | Nucleus | $\Sigma( \kappa-\langle \kappa \rangle ^3)$               |
| f129 | Curvature          | Nucleus | mean(  $\kappa-\langle \kappa \rangle$  ^2)               |
| f130 | Curvature          | Nucleus | mean(  $\kappa-\langle \kappa \rangle$  ^3)               |
| f131 | Curvature          | Nucleus | mean(  $\kappa-\langle \kappa \rangle$  ^4)               |
| f132 | Curvature          | Nucleus | mean(  $\kappa-\langle \kappa \rangle$  ^5)               |
| f133 | Curvature          | Nucleus | number of peaks                                           |
| f134 | Curvature          | Nucleus | gini coefficient ( $\kappa$ )                             |
| f135 | Curvature          | Cell    | mean( $\kappa$ ) ( $\equiv \langle \kappa \rangle$ )      |

|      |                          |                |                                                                                        |
|------|--------------------------|----------------|----------------------------------------------------------------------------------------|
| f136 | Curvature                | Cell           | median( $\kappa$ )                                                                     |
| f137 | Curvature                | Cell           | mode( $\kappa$ )                                                                       |
| f138 | Curvature                | Cell           | max( $\kappa$ )                                                                        |
| f139 | Curvature                | Cell           | min( $\kappa$ )                                                                        |
| f140 | Curvature                | Cell           | 25% percentile ( $\kappa$ )                                                            |
| f141 | Curvature                | Cell           | 75% percentile ( $\kappa$ )                                                            |
| f142 | Curvature                | Cell           | mean( $\kappa(\kappa > f141)$ );                                                       |
| f143 | Curvature                | Cell           | mean( $\kappa(\kappa < f140)$ );                                                       |
| f144 | Curvature                | Cell           | $\Sigma(\kappa)$                                                                       |
| f145 | Curvature                | Cell           | harmonic mean( $\kappa$ )                                                              |
| f146 | Curvature                | Cell           | 3% trimmed mean( $\kappa$ )                                                            |
| f147 | Curvature                | Cell           | 5% trimmed mean( $\kappa$ )                                                            |
| f148 | Curvature                | Cell           | 15% trimmed mean( $\kappa$ )                                                           |
| f149 | Curvature                | Cell           | 25% trimmed mean( $\kappa$ )                                                           |
| f150 | Curvature                | Cell           | standard deviation( $\kappa$ ) ( $\equiv \sigma_{\kappa}$ )                            |
| f151 | Curvature                | Cell           | $\sigma_{\kappa}/ \langle \kappa \rangle $                                             |
| f152 | Curvature                | Cell           | $\sigma_{\kappa}/ \text{median}(\kappa) $                                              |
| f153 | Curvature                | Cell           | $\sigma_{\kappa}/ \text{mode}(\kappa) $                                                |
| f154 | Curvature                | Cell           | skewness( $\kappa$ )                                                                   |
| f155 | Curvature                | Cell           | kurtosis( $\kappa$ )                                                                   |
| f156 | Curvature                | Cell           | mean( $ \kappa - \langle \kappa \rangle $ )                                            |
| f157 | Curvature                | Cell           | range( $\kappa$ )                                                                      |
| f158 | Curvature                | Cell           | interquartile range ( $\kappa$ )                                                       |
| f159 | Curvature                | Cell           | $\Sigma(\kappa^2)$                                                                     |
| f160 | Curvature                | Cell           | $\Sigma(\kappa^3)$                                                                     |
| f161 | Curvature                | Cell           | mean( $\kappa^2$ )                                                                     |
| f162 | Curvature                | Cell           | mean( $\kappa^3$ )                                                                     |
| f163 | Curvature                | Cell           | mean( $\kappa^4$ )                                                                     |
| f164 | Curvature                | Cell           | mean( $\kappa^5$ )                                                                     |
| f165 | Curvature                | Cell           | $\Sigma( \kappa - \langle \kappa \rangle ^2)$                                          |
| f166 | Curvature                | Cell           | $\Sigma( \kappa - \langle \kappa \rangle ^3)$                                          |
| f167 | Curvature                | Cell           | mean( $ \kappa - \langle \kappa \rangle ^2$ )                                          |
| f168 | Curvature                | Cell           | mean( $ \kappa - \langle \kappa \rangle ^3$ )                                          |
| f169 | Curvature                | Cell           | mean( $ \kappa - \langle \kappa \rangle ^4$ )                                          |
| f170 | Curvature                | Cell           | mean( $ \kappa - \langle \kappa \rangle ^5$ )                                          |
| f171 | Curvature                | Cell           | number of peaks                                                                        |
| f172 | Curvature                | Cell           | gini coefficient ( $\kappa$ )                                                          |
| f173 | NC-positioning signature | Nucleus & Cell | mean( $R'$ ) ( $\equiv \langle R' \rangle$ )                                           |
| f174 | NC-positioning signature | Nucleus & Cell | median( $R'$ )                                                                         |
| f175 | NC-positioning signature | Nucleus & Cell | mode( $R'$ )                                                                           |
| f176 | NC-positioning signature | Nucleus & Cell | ma $R'$ ( $R'$ )                                                                       |
| f177 | NC-positioning signature | Nucleus & Cell | min( $R'$ )                                                                            |
| f178 | NC-positioning signature | Nucleus & Cell | 25% percentile ( $R'$ )                                                                |
| f179 | NC-positioning signature | Nucleus & Cell | 75% percentile ( $R'$ )                                                                |
| f180 | NC-positioning signature | Nucleus & Cell | $\Sigma(R')$                                                                           |
| f181 | NC-positioning signature | Nucleus & Cell | harmonic mean( $R'$ )                                                                  |
| f182 | NC-positioning signature | Nucleus & Cell | 3% trimmed mean( $R'$ )                                                                |
| f183 | NC-positioning signature | Nucleus & Cell | 5% trimmed mean( $R'$ )                                                                |
| f184 | NC-positioning signature | Nucleus & Cell | 15% trimmed mean( $R'$ )                                                               |
| f185 | NC-positioning signature | Nucleus & Cell | 25% trimmed mean( $R'$ )                                                               |
| f186 | NC-positioning signature | Nucleus & Cell | standard deviation( $R'$ ) ( $\equiv \sigma_{R'}$ )                                    |
| f187 | NC-positioning signature | Nucleus & Cell | mean( $ R' - \langle R' \rangle $ )                                                    |
| f188 | NC-positioning signature | Nucleus & Cell | range( $R'$ )                                                                          |
| f189 | NC-positioning signature | Nucleus & Cell | interquartile range ( $R'$ )                                                           |
| f190 | NC-positioning signature | Nucleus & Cell | $\Sigma(R'^2)$                                                                         |
| f191 | NC-positioning signature | Nucleus & Cell | $\Sigma(R'^3)$                                                                         |
| f192 | NC-positioning signature | Nucleus & Cell | mean( $R'^2$ )                                                                         |
| f193 | NC-positioning signature | Nucleus & Cell | mean( $R'^3$ )                                                                         |
| f194 | NC-positioning signature | Nucleus & Cell | mean( $R'^4$ )                                                                         |
| f195 | NC-positioning signature | Nucleus & Cell | mean( $R'^5$ )                                                                         |
| f196 | NC-positioning signature | Nucleus & Cell | $\Sigma( R' - \langle R' \rangle ^2)$                                                  |
| f197 | NC-positioning signature | Nucleus & Cell | $\Sigma( R' - \langle R' \rangle ^3)$                                                  |
| f198 | NC-positioning signature | Nucleus & Cell | mean( $ R' - \langle R' \rangle ^2$ )                                                  |
| f199 | NC-positioning signature | Nucleus & Cell | mean( $ R' - \langle R' \rangle ^3$ )                                                  |
| f200 | NC-positioning signature | Nucleus & Cell | mean( $ R' - \langle R' \rangle ^4$ )                                                  |
| f201 | NC-positioning signature | Nucleus & Cell | mean( $ R' - \langle R' \rangle ^5$ )                                                  |
| f202 | NC-positioning signature | Nucleus & Cell | number of peaks                                                                        |
| f203 | NC-positioning signature | Nucleus & Cell | correlation coefficient between nucleus boundary signature and cell boundary signature |

|      |            |      |                                                   |
|------|------------|------|---------------------------------------------------|
| f204 | Protrusion | Cell | mean protrusion length                            |
| f205 | Protrusion | Cell | max protrusion length                             |
| f206 | Protrusion | Cell | number of protrusion                              |
| f207 | Protrusion | Cell | number of primary protrusion                      |
| f208 | Protrusion | Cell | number of secondary protrusion                    |
| f209 | Protrusion | Cell | Branching index (=f208/f207 )                     |
| f210 | Protrusion | Cell | mean primary protrusion length                    |
| f211 | Protrusion | Cell | max primary protrusion length                     |
| f212 | Protrusion | Cell | standard deviation of primary protrusion length   |
| f213 | Protrusion | Cell | mean secondary protrusion length                  |
| f214 | Protrusion | Cell | max secondary protrusion length                   |
| f215 | Protrusion | Cell | standard deviation of secondary protrusion length |
